# Supplementary material
Source: publisher figshare collection journal article supplement (https://acs.figshare.com/ndownloader/files/24173079)

***Supporting Information***  
**of**  
**Total Synthesis of Thromboxane B<sub>2</sub> via a Key Bicyclic Enal Intermediate**

Changcheng Jing and Varinder K. Aggarwal\*

School of Chemistry, University of Bristol, Cantock's Close, Bristol BS8 1TS, United Kingdom

**Table of Contents**

|                                          | <b>Page</b> |
|------------------------------------------|-------------|
| <b>General Information.....</b>          | <b>S1</b>   |
| <b>Experimental Procedures.....</b>      | <b>S3</b>   |
| <b>Notes and References.....</b>         | <b>S29</b>  |
| <b>NMR Spectra for the Products.....</b> | <b>S30</b>  |

## General Information

**Solvents and Reagents.** Generally, reactions were carried out using reagent grade solvents and without air excluded. Reactions requiring anhydrous solvents and an inert atmosphere were carried out under a nitrogen atmosphere using standard manifold techniques. All solvents were commercially supplied or obtained from a purification column composed of activated alumina.<sup>1</sup> All chemicals were purchased from Acros, Aldrich, Alfa Aesar, Fluka, Lancaster or Merck and used as received unless otherwise stated. Triethylamine and trimethylsilyl chloride were distilled over CaH<sub>2</sub> under reduced pressure prior to use. *n*-BuLi and *tert*-BuLi were purchased from Acros and were titrated against *N*-benzylbenzamide using the procedure of Chong *et al.*<sup>2</sup>

**Chromatography.** Flash column chromatography (FCC) was carried out using Sigma-Aldrich silica gel (60 Å, 230 – 400 mesh, 40 – 63 µm) or using Biotage Isolera™ One with Biotage® SNAP/SNAP Ultra Cartridges. All reactions were followed by thin-layer chromatography (TLC) when practical, using Merck Kieselgel 60 F254 fluorescent treated silica gel, which was visualized under UV light or by staining with aqueous basic potassium permanganate or an ethanolic and acidic solution of *p*-anisaldehyde.

**Spectroscopy.** <sup>1</sup>H and <sup>13</sup>C NMR spectra were recorded on Jeol ECS 400, Bruker Nano 400, Varian VNMR500 and Bruker Avance III HD 500 Cryo spectrometers. Chemical shift ( $\delta$  value) are referenced relative to the residual protiated solvent and are reported in parts per million (ppm), and coupling constants (*J* value) are given in Hertz (Hz). The <sup>1</sup>H NMR spectra are reported as follows: chemical shift, multiplicity (s = singlet, br.s = broad singlet, d = doublet, t = triplet, q = quartet, quin = quintet, sex = sextet, h = heptet, m = multiplet, dd = doublet of doublets, etc.), coupling constants and assignment. NMR assignments are made according to spin systems, using two-dimensional NMR spectroscopy (COSY, HSQC and HMBC etc.) to assist the assignment. High resolution mass spectra (HRMS) were recorded on a Bruker micrOTOF instrument by Electrospray Ionisation (ESI). Infra-red (IR) spectra were recorded on a Perkin Elmer Spectrum One FT-IR spectrometer as a thin film. Only selected absorption maxima ( $\nu_{\text{max}}$ ) are reported in wavenumbers (cm<sup>-1</sup>). Melting points were recorded in degrees Celsius (°C), using a Kofler hot-stage microscope apparatus and are reported uncorrected. Optical rotation ( $[\alpha]_{\text{D}}^{\text{T}}$ ) was measured on a Bellingham and Stanley Ltd. ADP220 polarimeter and is quoted in (° mL)(g dm)<sup>-1</sup>. Chiral supercritical fluid chromatography (SFC) was performed using a Daicel Chiralpak® IA column (4.6 × 250 mm × 5µm) using a Waters TharSFC system and monitored by Diode Array Detector (DAD).

*Naming of Compounds.* Compound names are generated by ChemDraw 11.0 software (PerkinElmer), following IUPAC nomenclature.

## Experimental Procedures

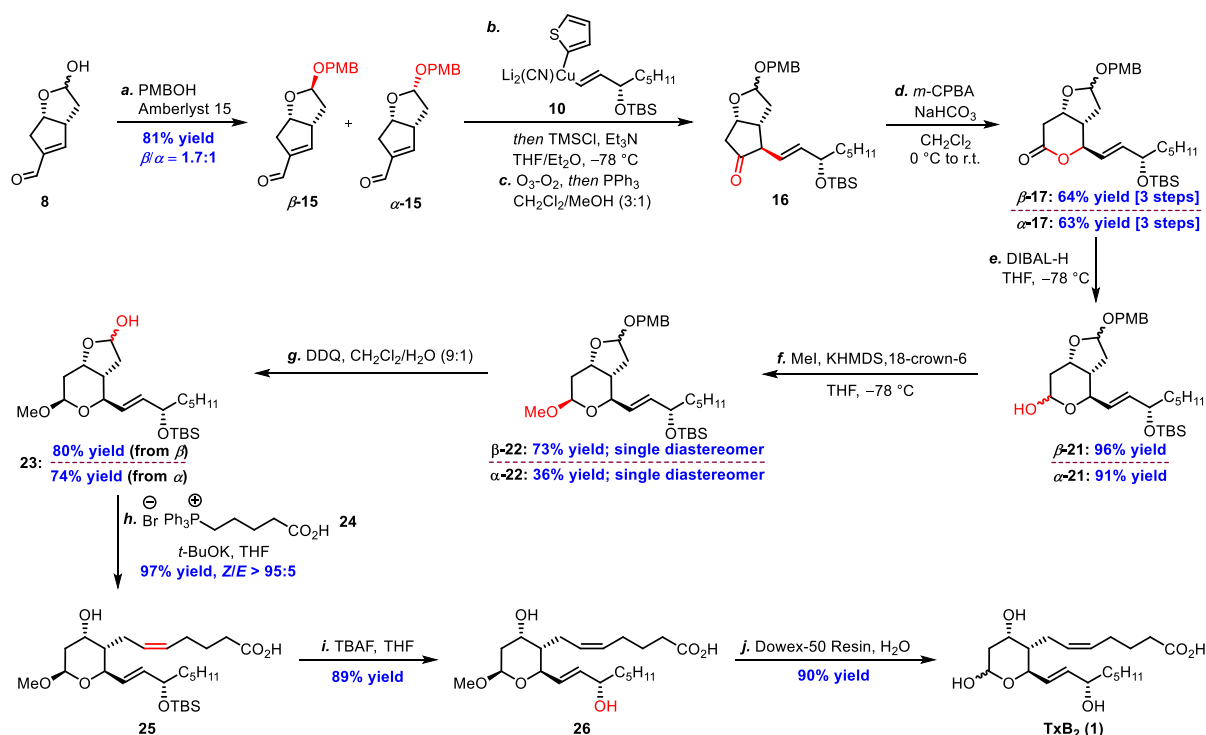

**Scheme S1. Complete synthetic scheme for the synthesis of thromboxane B<sub>2</sub>.** *Reagents and conditions:* (a) PMBOH (2 eq.), Amberlyst 15 (cat.), MgSO<sub>4</sub> (2.5 eq.), CH<sub>2</sub>Cl<sub>2</sub>, 0 °C to r.t., 24 h; then MnO<sub>2</sub> (6 eq.), r.t., 12 h, 81% yield, 1.7:1 β/α. (b) Cuprate **10** (1.2 eq.), THF/Et<sub>2</sub>O, −78 °C; then TMSCl (5 eq.), Et<sub>3</sub>N (6 eq.), −78 °C to −20 °C. (c) O<sub>3</sub>-O<sub>2</sub>, CH<sub>2</sub>Cl<sub>2</sub>/MeOH (v/v, 3:1), −78 °C; then PPh<sub>3</sub> (1.5 eq.). (d) *m*-CPBA (2.5 eq.), NaHCO<sub>3</sub> (2.7 eq.), CH<sub>2</sub>Cl<sub>2</sub>, 0 °C to r.t., 36 h, 64% yield for β, 63% yield for α, 3 steps. (e) DIBAL-H (3.0 eq.), THF, −78 °C, 3 h, 96% yield for β, 91% yield for α. (f) MeI (3 eq.), KHMDS (1.1 eq.), 18-Crown-6 (1.1 eq.), THF, −78 °C, 18 h, single diastereomer, 73% yield for β, 36% yield for α. (g) DDQ (1.5 eq.), CH<sub>2</sub>Cl<sub>2</sub>/H<sub>2</sub>O (v/v, 9:1), 0 °C to r.t., 6 h, 80% yield for β, 74% yield for α. (h) (4-carboxybutyl)triphenyl-phosphonium bromide (4 eq.), *t*-BuOK (8 eq.), THF, 0 °C to r.t., 2 h, 97% yield with *Z/E* > 95:5. (i) TBAF (2 eq.), THF, 0 °C to r.t., 12 h, 89% yield. (j) Dowex-50 Resin, H<sub>2</sub>O, r.t., 16 h, 90% yield. PMB, *p*-methoxybenzyl. TBS, *tert*-butyldimethylsilyl. TMS, trimethylsilyl. *m*-CPBA, *m*-chloroperoxybenzoic acid. DIBAL-H, diisobutylaluminum hydride. HMDS, bis(trimethylsilyl)amide. DDQ, 2,3-dichloro-5,6-dicyano-1,4-benzoquinone. TBAF, tetrabutylammonium fluoride.

### Synthesis of the key bicyclic enals **8** from 2,5-dimethoxytetrahydrofuran

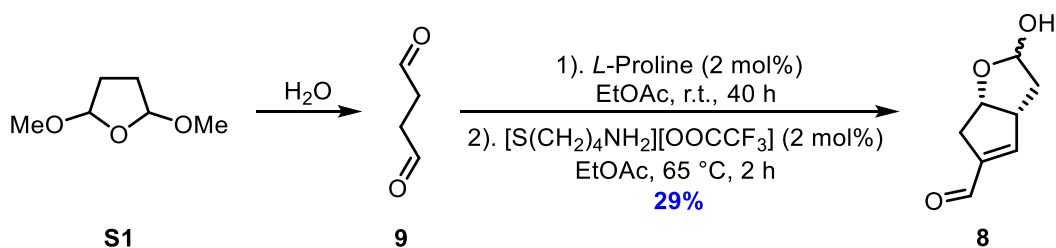

Lactol **8** was prepared from freshly distilled succinaldehyde (**9**) according to the literature, and afforded the product as a light brown solid whose analytical data was consistent with the data reported in the literature.<sup>3</sup> The enantiomeric excess was determined by SFC analysis of

(3a*R*,6a*S*)-2-oxo-3,3a,6,6a-tetrahydro-2*H*-cyclopenta[*b*]furan-5-carbaldehyde generated from simple oxidation of enal **8**.

(3a*R*,6a*S*)-2-Oxo-3,3a,6,6a-tetrahydro-2*H*-cyclopenta[*b*]furan-5-carbaldehyde (**7**)

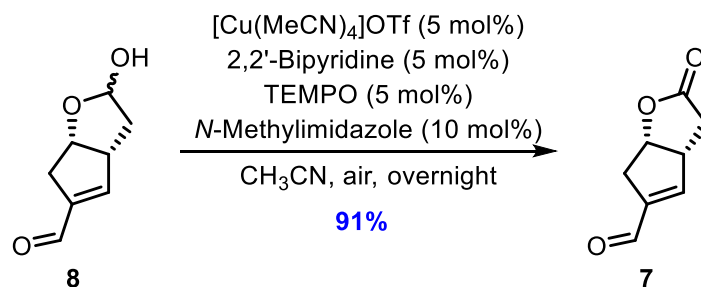

To a solution of lactol **8** (13.0 g, 84.3 mmol, 1.0 eq.) in acetonitrile (420 mL) were added tetrakisacetonitrile copper (I) triflate (1.59 g, 4.22 mmol, 5 mol %), 2,2'-bipyridine (658 mg, 4.22 mmol, 5 mol %), TEMPO (658 mg, 4.22 mmol, 5 mol %) and *N*-methylimidazole (671  $\mu\text{L}$ , 8.44 mmol, 10 mol %). The reaction mixture was stirred at r.t. overnight and then filtered through a silica plug, washed with EtOAc. The filtrate was concentrated, and the crude mixture was purified by flash column chromatography on silica gel (Hexanes/EtOAc = 50:50 to 30:70) to give the lactone **7** as a white solid (11.67 g, 76.71 mmol, 91%, 99:1 er).

Analytical data was consistent with data reported in the literature.<sup>4</sup>

The enantiomeric excess was determined by SFC analysis:

Chiral SFC Conditions: Chiralpak<sup>®</sup> IA column; 125 bar, 40 °C, flow rate 4 mL/min,  $\text{CO}_2/i$ -PrOH = 95:5; retention time:  $t_{\text{minor}} = 7.3$  min,  $t_{\text{major}} = 8.7$  min; er = 99:1.

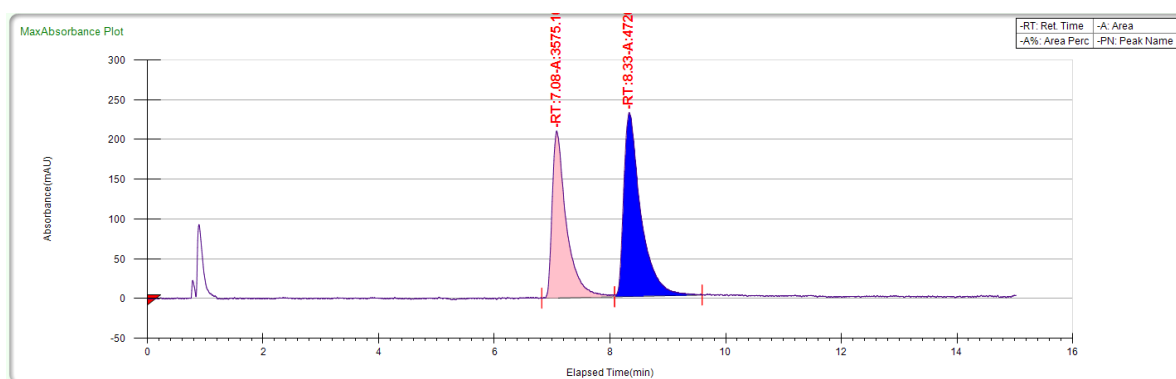

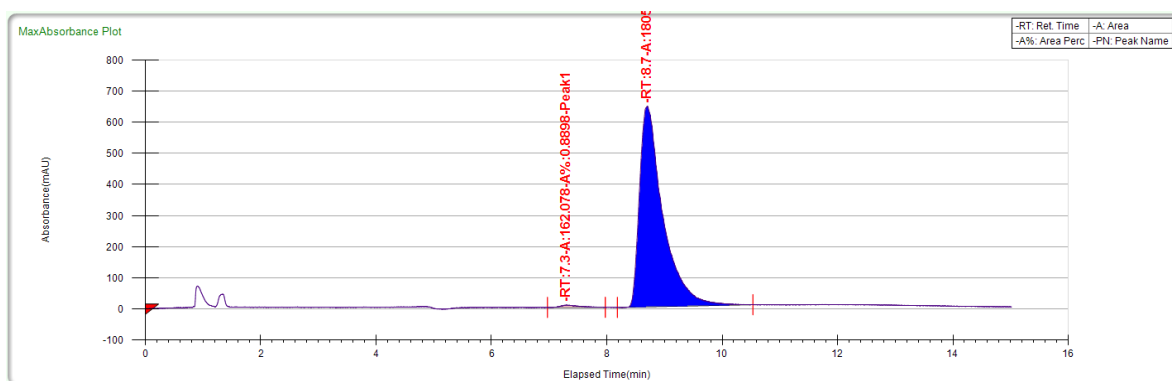

## Synthesis of side chains

### Synthesis of (*S,E*)-((1-bromooct-1-en-3-yl)oxy)(*tert*-butyl)dimethylsilane (**S5**) from **S2**

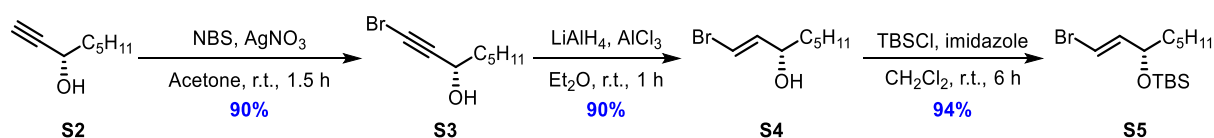

### (*S*)-1-Bromooct-1-yn-3-ol (**S3**)

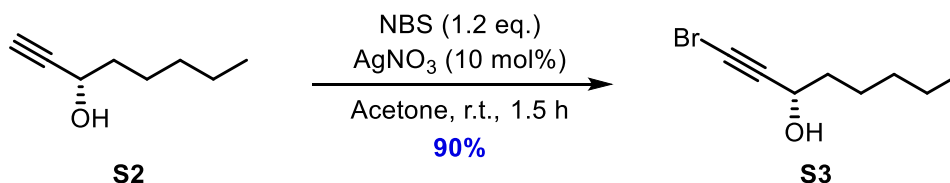

To a stirring solution of **S2** (3.8 g, 30.0 mmol, 1.0 eq.) in acetone (150 mL) was added NBS (6.4 g, 36.0 mmol, 1.2 eq.) and AgNO<sub>3</sub> (510 mg, 3.0 mmol, 10 mol %) sequentially. The reaction mixture was stirred at r.t. for 1.5 h before it was poured over H<sub>2</sub>O (160 mL) and extracted with EtOAc (3 × 160 mL). The organic phases were combined, washed with brine, dried over MgSO<sub>4</sub>, filtered, and the solvent was removed under reduced pressure. The crude product was purified by flash column chromatography on silica gel (Hexanes/EtOAc = 19:1 to 9:1) to give alcohol **S3** (5.5 g, 27.0 mmol, 90%) as a clear, colorless oil.

*R*<sub>f</sub> = 0.46 (Hexanes/EtOAc = 9:1)

**IR** (thin film)  $\nu_{\text{max}}/\text{cm}^{-1}$ : 3357, 2958, 2933, 2860, 1462, 1390, 1250, 1224, 1055, 895, 757.

**<sup>1</sup>H NMR** (400 MHz, CDCl<sub>3</sub>)  $\delta_{\text{H}}$  = 4.39 (t, *J* = 6.6 Hz, 1H), 1.73 – 1.67 (m, 3H), 1.49 – 1.39 (m, 2H), 1.38 – 1.27 (m, 4H), 0.90 (t, *J* = 7.0 Hz, 3H).

**<sup>13</sup>C NMR** (100 MHz, CDCl<sub>3</sub>)  $\delta_{\text{C}}$  = 81.4, 63.4, 45.1, 37.8, 31.5, 24.8, 22.7, 14.1.

$[\alpha]_{\text{D}}^{25}$  = +3.0 (*c* 1.00, CHCl<sub>3</sub>).

Analytical data is consistent with data reported in the literature.<sup>5</sup>

### (*S,E*)-1-Bromooct-1-en-3-ol (**S4**)

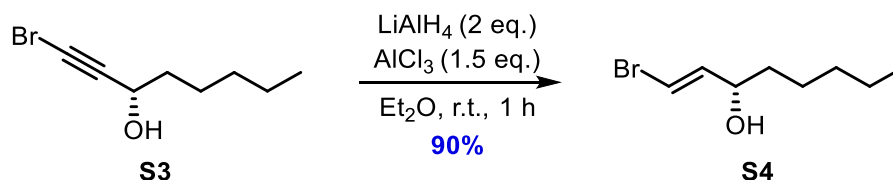

To a solution of  $\text{LiAlH}_4$  (1.5 g, 40.0 mmol, 2.0 eq.) in dry  $\text{Et}_2\text{O}$  (75 mL),  $\text{AlCl}_3$  (4.0 g, 30.0 mmol, 1.5 eq.) was carefully added portion-wise. A solution of **S3** (4.1 g, 20.0 mmol, 1.0 eq.) in dry  $\text{Et}_2\text{O}$  (14.5 mL) was added dropwise to the above mixture, and the resulting reaction mixture was stirred at r.t. for 1 h. Following cooling to 0 °C,  $\text{H}_2\text{O}$  (1.5 mL) was carefully added dropwise followed by aqueous  $\text{NaOH}$  solution (0.5 M, 1.5 mL) and then a further portion of  $\text{H}_2\text{O}$  (4.6 mL). The mixture was stirred at r.t. for 30 min,  $\text{MgSO}_4$  (20.5 g) was added and the mixture was stirred for a further 15 min prior to sinter filtration, washing with  $\text{Et}_2\text{O}$  ( $3 \times 80$  mL). The filtrate was concentrated *in vacuo* to afford pure **S4** (3.7 g, 17.9 mmol, 90%) as a clear, colorless oil.

$R_f = 0.46$  (Hexanes/ $\text{EtOAc} = 9:1$ )

**IR** (thin film)  $\nu_{\text{max}}/\text{cm}^{-1}$ : 3358, 2956, 2929, 2858, 1620, 1465, 1379, 1266, 1028, 937, 791, 724.

**$^1\text{H}$  NMR** (400 MHz,  $\text{CDCl}_3$ )  $\delta_{\text{H}} = 6.32$  (dd,  $J = 13.6, 0.9$  Hz, 1H), 6.23 (dd,  $J = 13.6, 6.5$  Hz, 1H), 4.11 (qd,  $J = 6.9, 0.8$  Hz, 1H), 1.72 (br.s, 1H), 1.54 – 1.48 (m, 2H), 1.35 – 1.27 (m, 6H), 0.89 (t,  $J = 6.9$  Hz, 3H).

**$^{13}\text{C}$  NMR** (100 MHz,  $\text{CDCl}_3$ )  $\delta_{\text{C}} = 140.6, 107.1, 72.8, 37.0, 31.8, 25.0, 22.7, 14.1$ .

$[\alpha]_{\text{D}}^{25} = +4.0$  ( $c$  1.00,  $\text{CHCl}_3$ ) [lit.<sup>5</sup>  $[\alpha]_{\text{D}}^{23} = +5.0$  ( $c$  2.00,  $\text{CHCl}_3$ )]

Analytical data is consistent with data reported in the literature.<sup>5,6</sup>

**(S,E)-((1-Bromooct-1-en-3-yl)oxy)(tert-butyl)dimethylsilane (S5)**

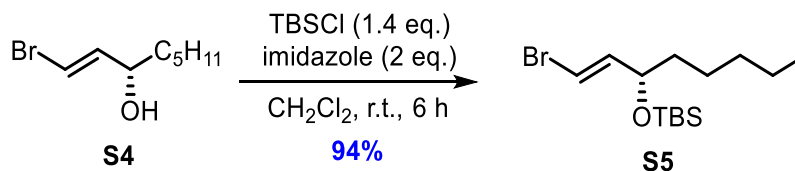

Imidazole (2.4 g, 35.8 mmol, 2.0 eq.) and TBSCl (3.8 g, 25.1 mmol, 1.4 eq.) were sequentially added to a stirring solution of **S4** (3.7 g, 17.9 mmol, 1.0 eq.) in  $\text{CH}_2\text{Cl}_2$  (40 mL) at 0 °C. The reaction mixture was stirred at r.t. for 6 h before it was poured over aqueous  $\text{HCl}$  (0.5 M, 80 mL) and extracted with  $\text{Et}_2\text{O}$  ( $3 \times 80$  mL). The organic phases were combined, dried over  $\text{MgSO}_4$ , filtered and concentrated *in vacuo*. The crude product was purified by flash column

chromatography on silica gel (Hexanes) to give pure **S5** as a clear, colorless oil (5.4 g, 16.8 mmol, 94%).

$R_f = 0.52$  (Hexanes)

**IR** (thin film)  $\nu_{\max}/\text{cm}^{-1}$ : 2955, 2929, 2857, 1624, 1470, 1360, 1255, 1089, 936, 835, 715, 706.

**$^1\text{H}$  NMR** (400 MHz,  $\text{CDCl}_3$ )  $\delta_{\text{H}} = 6.22 - 6.14$  (m, 2H), 4.09 (tdd,  $J = 6.2, 4.0, 0.9$  Hz, 1H), 1.52–1.41 (m, 2H), 1.35 – 1.23 (m, 6H), 0.90 – 0.87 (m, 12H), 0.05 (s, 3H), 0.04 (s, 3H).

**$^{13}\text{C}$  NMR** (100 MHz,  $\text{CDCl}_3$ )  $\delta_{\text{C}} = 141.2, 105.6, 73.3, 37.9, 31.9, 26.0, 24.7, 22.5, 18.3, 14.2, -4.4, -4.7$ .

$[\alpha]_{\text{D}}^{24} = -14.0$  ( $c$  1.00,  $\text{CHCl}_3$ ) [lit.<sup>7</sup> $[\alpha]_{\text{D}}^{22} = -19.9$  ( $c$  1.00,  $\text{CHCl}_3$ )]

Analytical data is consistent with data reported in the literature.<sup>7</sup>

### Synthesis of the enals **15**

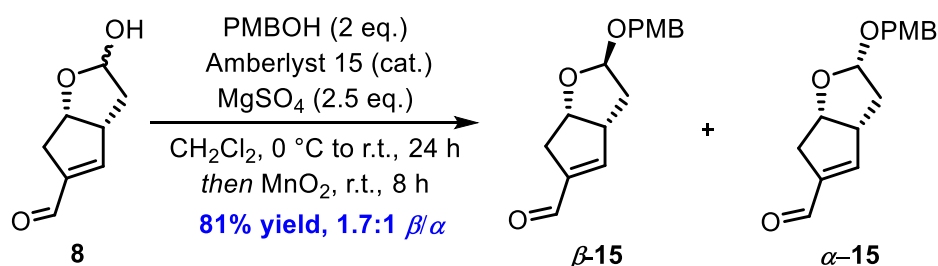

To an oven-dried flask, enal **8** (11.9 g, 77.5 mmol, 1.0 eq.), amberlyst 15 (2.4 g) and  $\text{MgSO}_4$  (23.3 g, 194 mmol, 2.5 eq., dried under *vacuum* at 400 °C) were dissolved in  $\text{CH}_2\text{Cl}_2$  (77.5 mL) at 0 °C under  $\text{N}_2$  atmosphere. Then, a solution of 4-methoxybenzyl alcohol (21.4 g, 155 mmol, 2 eq.) in dry  $\text{CH}_2\text{Cl}_2$  (77.5 mL) was added to the above mixture at the same temperature, and the resulting reaction mixture was stirred at r.t. After 24 h,  $\text{MnO}_2$  (26.9 g, 310 mmol, 4.0 eq.) was added, and the reaction was stirred at r.t. overnight. The reaction mixture was filtered through Celite® and washed with  $\text{CH}_2\text{Cl}_2$ . The filtrate was concentrated *in vacuo* and purified by flash column chromatography on silica gel (Toluene/ $\text{Et}_2\text{O} = 10:1$  to 1:1) to give pure  $\beta\text{-15}$  (major) and  $\alpha\text{-15}$  (minor) (17.2 g, 62.8 mmol, 81%, 1.7:1  $\beta/\alpha$ ) as white amorphous solids.

**(2*R*,3*aR*,6*aS*)-2-((4-Methoxybenzyl)oxy)-3,3*a*,6,6*a*-tetrahydro-2*H*-cyclopenta[*b*]furan-5-carbaldehyde ( $\beta\text{-15}$ )**



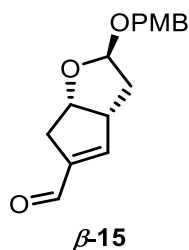

**R<sub>f</sub>** = 0.49 (Toluene/Et<sub>2</sub>O = 7:3)

**IR** (thin film)  $\nu_{\text{max}}/\text{cm}^{-1}$ : 2932, 2834, 1680, 1613, 1513, 1464, 1302, 1247, 1172, 1093, 1029, 978, 822, 706.

**<sup>1</sup>H NMR** (500 MHz, CDCl<sub>3</sub>)  $\delta_{\text{H}}$  = 9.78 (s, 1H), 7.29 – 7.26 (m, 2H), 6.91 – 6.86 (m, 2H), 6.65 (q,  $J$  = 2.0 Hz, 1H), 5.23 (d,  $J$  = 5.1 Hz, 1H), 4.86 (dt,  $J$  = 6.9, 3.8 Hz, 1H), 4.65 (d,  $J$  = 11.3 Hz, 1H), 4.41 (d,  $J$  = 11.3 Hz, 1H), 3.81 (s, 3H), 3.69 – 3.60 (m, 1H), 2.80 – 2.74 (m, 2H), 2.31 (ddd,  $J$  = 13.3, 10.1, 1.1 Hz, 1H), 1.91 (dt,  $J$  = 13.3, 5.4 Hz, 1H).

**<sup>13</sup>C NMR** (125 MHz, CDCl<sub>3</sub>)  $\delta_{\text{C}}$  = 190.1, 159.4, 152.6, 144.7, 130.0, 129.8, 114.0, 102.9, 80.6, 68.6, 55.4, 49.5, 37.4, 35.3.

**HRMS** (ESI)  $m/z$ : [M+Na]<sup>+</sup> Calcd. for C<sub>16</sub>H<sub>18</sub>NaO<sub>4</sub> 297.1097; Found 297.1097.

**$[\alpha]_{\text{D}}^{22}$**  = –134.5 ( $c$  1.05, CHCl<sub>3</sub>)

**(2*S*,3*aR*,6*aS*)-2-((4-Methoxybenzyl)oxy)-3,3*a*,6,6*a*-tetrahydro-2*H*-cyclopenta[*b*]furan-5-carbaldehyde ( $\alpha$ -15)**

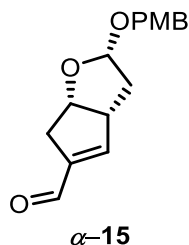

**R<sub>f</sub>** = 0.38 (Toluene/Et<sub>2</sub>O = 7:3)

**IR** (thin film)  $\nu_{\text{max}}/\text{cm}^{-1}$ : 2945, 2910, 2835, 1677, 1613, 1585, 1513, 1464, 1359, 1301, 1247, 1159, 1078, 1030, 948, 822, 708.

**<sup>1</sup>H NMR** (500 MHz, CDCl<sub>3</sub>)  $\delta_{\text{H}}$  = 9.76 (s, 1H), 7.11 – 7.08 (m, 2H), 6.83 – 6.80 (m, 2H), 6.74 (q,  $J$  = 2.0 Hz, 1H), 5.20 (d,  $J$  = 4.8 Hz, 1H), 4.96 (dt,  $J$  = 6.5, 4.1 Hz, 1H), 4.52 (d,  $J$  = 11.2 Hz, 1H), 4.26 (d,  $J$  = 11.2 Hz, 1H), 3.78 (s, 3H), 3.56 (ddt,  $J$  = 9.4, 6.3, 1.7 Hz, 1H), 2.83 (dd,  $J$  = 3.2, 1.7 Hz, 2H), 2.22 – 2.16 (m, 1H), 2.14 – 2.10 (m, 1H).

**<sup>13</sup>C NMR** (125 MHz, CDCl<sub>3</sub>)  $\delta_{\text{C}}$  = 190.1, 159.3, 153.4, 144.6, 130.0, 129.7, 113.9, 103.0, 82.8, 68.7, 55.4, 49.9, 38.0, 37.3.

**HRMS** (ESI) *m/z*: [M+Na]<sup>+</sup> Calcd. for C<sub>16</sub>H<sub>18</sub>NaO<sub>4</sub> 297.1097; Found 297.1108.

[ $\alpha$ ]<sub>D</sub><sup>23</sup> = −36.0 (*c* 1.00, CHCl<sub>3</sub>)

**(2*R*,3*aS*,4*R*,7*aS*)-4-((*S,E*)-3-((*tert*-Butyldimethylsilyl)oxy)oct-1-en-1-yl)-2-((4-methoxybenzyl)oxy)hexahydro-6*H*-furo[3,2-*c*]pyran-6-one ( $\beta$ -17)**

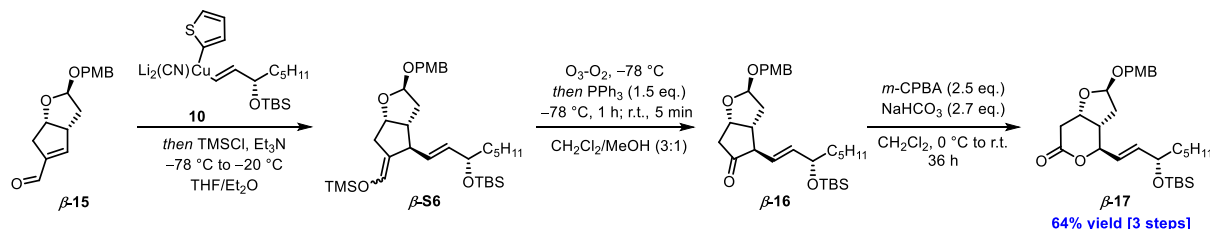

To a solution of **S5** (3.5 g, 10.8 mmol, 1.2 eq.) in Et<sub>2</sub>O (43.2 mL) stirring at −78 °C, *t*-BuLi (1.7 M in pentane, 12.7 mL, 21.6 mmol, 2.4 eq.) was added dropwise and the resulting pale yellow solution was stirred at −78 °C for 2 h prior to warming to −40 °C to stir for a further 2 h before cooling back to −78 °C.

A separate solution of thiophene (866  $\mu$ L, 909 mg, 10.8 mmol, 1.2 eq.) in THF (43.2 mL) was prepared and cooled to −40 °C and *n*-BuLi (1.6 M in hexanes, 6.8 mL, 10.8 mmol, 1.2 eq.) was added dropwise. The resulting colorless/very pale yellow, clear solution was stirred at −40 °C for 45 min before cooling to −78 °C whereupon CuCN (967 mg, 10.8 mmol, 1.2 eq.) was added in a single portion and the solution was warmed to r.t. The formed thienyl cuprate solution was then added to the above vinyl lithium solution at −78 °C and THF (43.2 mL) was added (used for washing the flask). The bright yellow reaction mixture was warmed to −20 °C to facilitate the formation of cuprate **10**. The reaction mixture was stirred at −20 °C for 1 h before cooling back to −78 °C.

A solution of  $\beta$ -15 (2.5 g, 9.0 mmol, 1.0 eq.) in THF (43.2 mL) was prepared and added to the solution of cuprate **10** at −78 °C to give a bright orange reaction mixture. The reaction mixture was stirred at −78 °C for 1 h before the sequential addition of TMSCl (5.7 mL, 4.9 g, 45.0 mmol, 5.0 eq.) and Et<sub>3</sub>N (7.5 mL, 5.5 g, 54.0 mmol, 6.0 eq.). The reaction mixture was warmed to −20 °C to stir for 20 min before quenching by addition of saturated aqueous NH<sub>4</sub>Cl solution (80 mL) and warming to r.t.. The aqueous phase was extracted with EtOAc (3  $\times$  80 mL), the organic phases were then combined, washed further with saturated aqueous Na<sub>2</sub>S<sub>2</sub>O<sub>3</sub> solution (80 mL), washed with brine, dried over MgSO<sub>4</sub>, filtered and concentrated *in vacuo* to give crude  $\beta$ -S6 as a brown oil, which was used directly in the next step.

In a round-bottom flask, a solution of crude  $\beta$ -S6 in CH<sub>2</sub>Cl<sub>2</sub>/MeOH (72 mL, 3:1 *v/v*) was cooled to −78 °C and a stream of O<sub>3</sub>-O<sub>2</sub> (g) was bubbled through the reaction solution. The reaction

progress was carefully monitored by TLC (Hexanes/EtOAc = 6:1) until a small amount of  $\beta$ -**S6** remained (~7.0 min). The reaction mixture was then purged of O<sub>3</sub> (g) by bubbling N<sub>2</sub> (g) through the solution for 20 min followed by the addition of freshly ground PPh<sub>3</sub> (3.5 g, 13.5 mmol, 1.5 eq.). The reaction was stirred at -78 °C for 1 h before the dry ice/acetone bath was removed and the reaction was allowed to warm to r.t., at which point it was stirred for a further 5 min. The reaction mixture was then poured over saturated brine solution (80 mL) and extracted with EtOAc (3 × 80 mL). The organic phases were combined, dried over MgSO<sub>4</sub>, filtered and concentrated *in vacuo* to give crude  $\beta$ -**16** as a brown oil, which was used directly in the next step.

In a round-bottom flask, a solution of crude  $\beta$ -**16** in dry CH<sub>2</sub>Cl<sub>2</sub> (90 mL) was cooled to 0 °C. Then, *m*-CPBA (77% purity, 5.0 g, 22.5 mmol, 2.5 eq.) and NaHCO<sub>3</sub> (2.0 g, 24.3 mmol, 2.7 eq.) were added to the above mixture at 0 °C under N<sub>2</sub> atmosphere, and the mixture was stirred for 36 h at r.t. The reaction mixture was diluted with EtOAc and poured over water (80 mL) and extracted with EtOAc (3 × 80 mL). The organic phases were combined, washed with 5% Na<sub>2</sub>S<sub>2</sub>O<sub>3</sub> solution (60 mL), 5% Na<sub>2</sub>CO<sub>3</sub> solution (60 mL), saturated brine solution (60 mL), dried over MgSO<sub>4</sub>, filtered and concentrated *in vacuo*. The crude product was purified by flash column chromatography on silica gel (Hexanes/EtOAc = 10:1 to 4:1) to give pure  $\beta$ -**17** (3.0 g, 5.8 mmol, 64%) as a white amorphous solid.

**Mp** 37 – 41 °C

**R<sub>f</sub>** = 0.32 (Hexanes/EtOAc = 4:1)

**IR** (thin film)  $\nu_{\text{max}}/\text{cm}^{-1}$ : 2953, 2929, 2858, 1752, 1613, 1514, 1453, 1353, 1302, 1248, 1173, 1152, 1090, 1029, 873, 836, 775.

**<sup>1</sup>H NMR** (500 MHz, CDCl<sub>3</sub>)  $\delta_{\text{H}}$  = 7.28 – 7.21 (m, 2H), 6.91 – 6.82 (m, 2H), 5.80 (ddd, *J* = 15.5, 5.4, 1.1 Hz, 1H), 5.61 (ddd, *J* = 15.5, 6.8, 1.4 Hz, 1H), 5.25 (d, *J* = 4.7 Hz, 1H), 4.61 (d, *J* = 11.3 Hz, 1H), 4.55 – 4.45 (m, 2H), 4.40 (d, *J* = 11.3 Hz, 1H), 4.15 – 4.09 (m, 1H), 3.80 (s, 3H), 3.02 (dd, *J* = 15.4, 6.8 Hz, 1H), 2.63 (ddd, *J* = 15.9, 8.4, 2.5 Hz, 2H), 2.10 (dd, *J* = 13.5, 9.1 Hz, 1H), 1.73 (ddd, *J* = 13.5, 6.9, 5.0 Hz, 1H), 1.50 – 1.39 (m, 2H), 1.33 – 1.21 (m, 6H), 1.01 – 0.67 (m, 12H), 0.04 (s, 3H), 0.00 (s, 3H).

**<sup>13</sup>C NMR** (125 MHz, CDCl<sub>3</sub>)  $\delta_{\text{C}}$  = 170.6, 159.5, 139.2, 129.8, 129.8, 129.7, 124.4, 114.0, 102.6, 80.8, 72.6, 72.2, 68.7, 55.4, 41.0, 38.1, 35.6, 35.5, 31.9, 26.0, 24.8, 22.7, 14.1, -4.3, -4.7.

**HRMS** (ESI) *m/z*: [M+Na]<sup>+</sup> Calcd. for C<sub>29</sub>H<sub>46</sub>NaO<sub>6</sub>Si 541.2955; Found 541.2950.

[ $\alpha$ ]<sub>D</sub><sup>24</sup> = -24.3 (*c* 1.00, CHCl<sub>3</sub>)

**(2*R*,3*aS*,4*R*,7*aS*)-4-((*S,E*)-3-((*tert*-Butyldimethylsilyl)oxy)oct-1-en-1-yl)-2-((4-methoxybenzyl)oxy)hexahydro-4*H*-furo[3,2-*c*]pyran-6-ol ( $\beta$ -17)**

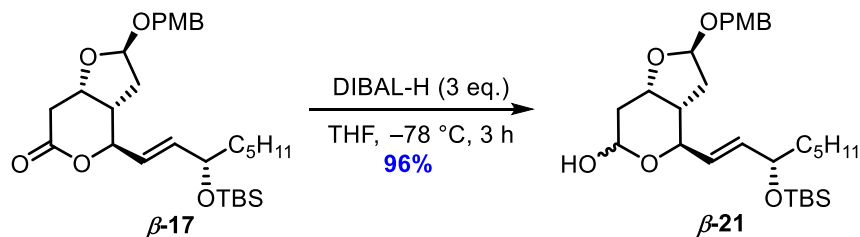

To a solution of  $\beta$ -17 (622.6 mg, 1.20 mmol, 1.0 eq.) in dry THF (12.0 mL) at  $-78\text{ }^{\circ}\text{C}$  under  $\text{N}_2$  atmosphere, diisobutylaluminium hydride (1.0 M in hexanes, 3.6 mL, 3.6 mmol, 3.0 eq.) was added dropwisely. The reaction mixture was stirred at  $-78\text{ }^{\circ}\text{C}$  for 3 h and quenched by addition of saturated potassium sodium tartrate solution (12.0 mL). The reaction mixture was warmed to r.t., and stirred for 30 min at r.t.. The aqueous phase was extracted with EtOAc ( $3 \times 10\text{ mL}$ ). The organic phases were combined, washed with brine, dried over  $\text{MgSO}_4$ , filtered and concentrated *in vacuo*. The crude product was purified by flash column chromatography on silica gel (Hexanes/EtOAc = 9:1 to 3:1) to give pure  $\beta$ -21 (1.2:1 epimers, 602.0 mg, 1.16 mmol, 96%) as a colorless oil.

$R_f = 0.26$  (Hexanes/EtOAc = 3:1)

**IR** (thin film)  $\nu_{\text{max}}/\text{cm}^{-1}$ : 3381, 2956, 2930, 2857, 1612, 1514, 1463, 1361, 1333, 1300, 1249, 1172, 1081, 1059, 1053, 1037, 1004, 974, 835, 774.

**$^1\text{H NMR}$**  (400 MHz,  $\text{CDCl}_3$ ) *Epimer a*:  $\delta_{\text{H}} = 7.39 - 7.19$  (m, 2H), 6.92 – 6.79 (m, 2H), 5.74 – 5.61 (m, 1H), 5.56 – 5.46 (m, 1H), 5.27 (t,  $J = 4.6\text{ Hz}$ , 1H), 5.24 (d,  $J = 5.8\text{ Hz}$ , 1H), 4.73 – 4.59 (m, 1H), 4.44 – 4.37 (m, 1H), 4.32 (q,  $J = 3.8\text{ Hz}$ , 1H), 4.09 – 4.03 (m, 1H), 4.00 (dd,  $J = 10.6, 6.9\text{ Hz}$ , 1H), 3.77 (s, 3H), 3.60 (dd,  $J = 10.4, 6.9\text{ Hz}$ , 1H), 2.23 (dt,  $J = 14.3, 2.6\text{ Hz}$ , 1H), 2.15 – 2.04 (m, 1H), 2.03 – 1.85 (m, 2H), 1.71 (ddd,  $J = 14.0, 9.4, 4.2\text{ Hz}$ , 1H), 1.49 – 1.37 (m, 2H), 1.30 – 1.16 (m, 6H), 0.93 – 0.79 (m, 12H), 0.00 (s, 3H), -0.03 (s, 3H); *Epimer b*:  $\delta_{\text{H}} = 7.39 - 7.19$  (m, 2H), 6.92 – 6.79 (m, 2H), 5.74 – 5.61 (m, 1H), 5.56 – 5.46 (m, 1H), 5.18 (dd,  $J = 5.8, 3.2\text{ Hz}$ , 1H), 5.01 (d,  $J = 9.3\text{ Hz}$ , 1H), 4.73 – 4.59 (m, 1H), 4.44 – 4.37 (m, 1H), 4.36 (td,  $J = 4.1, 2.6\text{ Hz}$ , 1H), 4.15 (d,  $J = 8.8\text{ Hz}$ , 1H), 4.09 – 4.03 (m, 1H), 3.77 (s, 3H), 3.01 (s, 1H), 2.15 – 2.04 (m, 1H), 2.03 – 1.85 (m, 3H), 1.81 (dd,  $J = 13.9, 5.9\text{ Hz}$ , 1H), 1.49 – 1.37 (m, 2H), 1.30 – 1.16 (m, 6H), 0.93 – 0.79 (m, 12H), 0.00 (s, 3H), -0.03 (s, 3H).

**$^{13}\text{C NMR}$**  (100 MHz,  $\text{CDCl}_3$ ) *Epimer a* and *b*:  $\delta_{\text{C}} = 159.4, 159.4, 137.1, 137.1, 130.2, 129.9, 129.7, 129.6, 127.3, 127.0, 114.0, 113.9, 102.4, 102.2, 92.8, 91.3, 77.1, 74.8, 73.4, 72.7, 72.7,$

69.7, 69.4, 68.6, 55.4, 40.9, 40.9, 38.4, 36.7, 35.9, 34.0, 31.9, 31.7, 31.1, 26.0, 25.1, 22.8, 22.8, 18.4, 14.3, 14.2, -4.1, -4.7.

**HRMS** (ESI)  $m/z$ :  $[M+Na]^+$  Calcd. for  $C_{29}H_{48}NaO_6Si$  543.3112; Found 543.3117.

$[\alpha]_D^{23} = -56.67$  ( $c$  1.00,  $CHCl_3$ )

***tert*-Butyl(((*S,E*)-1-((2*R*,3*aS*,4*R*,6*R*,7*aS*)-6-methoxy-2-((4-methoxybenzyl)oxy)hexahydro-4*H*-furo[3,2-*c*]pyran-4-yl)oct-1-en-3-yl)oxy)dimethylsilane ( $\beta$ -22)**

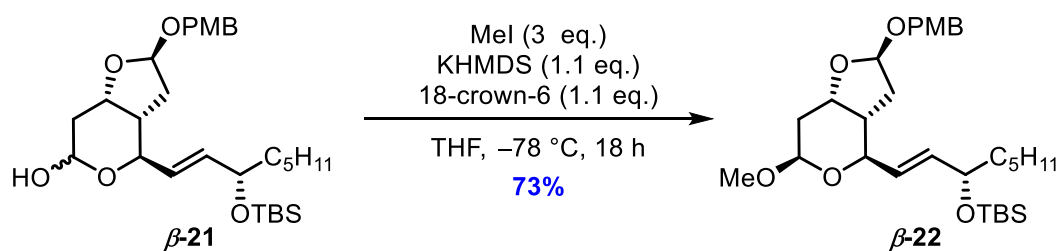

In an oven-dried Schlenk tube, KHMDS (1.0 M in THF, 1.2 mL, 1.16 mmol, 1.1 eq.) was added to a solution of lactol  $\beta$ -21 (546.8 mg, 1.05 mmol, 1.0 eq.) in dry THF (6.2 mL) at  $-78^\circ\text{C}$  under  $N_2$  atmosphere, and the reaction mixture was stirred at this temperature for 40 min. Then a solution of 18-crown-6 (306.6 mg, 1.16 mmol, 1.1 eq.) in dry THF (2.1 mL) was added slowly to the above mixture at  $-78^\circ\text{C}$ . After stirring for 40 min at  $-78^\circ\text{C}$ , methyl iodide (196  $\mu\text{L}$ , 447.1 mg, 3.15 mmol, 3.0 eq.) was added and the reaction mixture was stirred at  $-78^\circ\text{C}$  for 18 h. The mixture was quenched by the addition of water (15 mL), and the aqueous phase was extracted with EtOAc ( $3 \times 15$  mL). The organic phases were combined, washed with brine, dried over  $MgSO_4$ , filtered and concentrated *in vacuo*. The crude product was purified by flash column chromatography on silica gel (Hexanes/EtOAc = 15:1 to 9:1) to give pure  $\beta$ -22 (410.2 mg, 0.767 mmol, 73%) as a colorless oil.

$R_f = 0.23$  (Hexanes/EtOAc = 9:1)

**IR** (thin film)  $\nu_{\text{max}}/\text{cm}^{-1}$ : 2955, 2930, 2856, 1613, 1514, 1463, 1360, 1302, 1249, 1205, 1139, 1085, 1059, 1036, 1005, 969, 835, 775.

**$^1\text{H}$  NMR** (400 MHz,  $CDCl_3$ )  $\delta_H$  = 7.27 (dd,  $J$  = 6.8, 1.9 Hz, 2H), 6.95 – 6.81 (m, 2H), 5.67 (ddd,  $J$  = 15.4, 6.1, 0.8 Hz, 1H), 5.54 (ddd,  $J$  = 15.4, 7.0, 1.1 Hz, 1H), 5.22 (dd,  $J$  = 5.8, 3.2 Hz, 1H), 4.69 (d,  $J$  = 11.4 Hz, 1H), 4.62 (dd,  $J$  = 9.2, 2.4 Hz, 1H), 4.42 (d,  $J$  = 11.4 Hz, 1H), 4.38 (td,  $J$  = 4.2, 2.7 Hz, 1H), 4.08 (q,  $J$  = 6.0 Hz, 1H), 3.80 (s, 3H), 3.59 (dd,  $J$  = 10.5, 6.9 Hz, 1H), 3.48 (s, 3H), 2.17 (dt,  $J$  = 14.3, 2.6 Hz, 1H), 2.06 – 1.99 (m, 1H), 1.93 (ddd,  $J$  = 14.1, 7.3, 3.3

Hz, 1H), 1.88 – 1.75 (m, 2H), 1.51 – 1.40 (m, 2H), 1.34 – 1.23 (m, 6H), 0.93 – 0.82 (m, 12H), 0.04 (s, 3H), 0.02 (s, 3H).

<sup>13</sup>C NMR (100 MHz, CDCl<sub>3</sub>)  $\delta_C$  = 159.4, 137.1, 130.2, 129.6, 127.5, 113.9, 102.3, 99.6, 76.9, 74.8, 73.0, 69.4, 56.3, 55.4, 41.2, 38.3, 35.9, 32.7, 31.9, 26.1, 25.1, 22.8, 18.4, 14.2, -4.1, -4.6.

HRMS (ESI) m/z: [M+Na]<sup>+</sup> Calcd. for C<sub>30</sub>H<sub>50</sub>NaO<sub>6</sub>Si 557.3269; Found 557.3247.

[ $\alpha$ ]<sub>D</sub><sup>24</sup> = -72.30 (c 1.00, CHCl<sub>3</sub>)

**(3a*S*,4*R*,6*R*,7a*S*)-4-((*S,E*)-3-((*tert*-Butyldimethylsilyl)oxy)oct-1-en-1-yl)-6-methoxyhexahydro-4*H*-furo[3,2-*c*]pyran-2-ol (23, from  $\beta$ -22)**

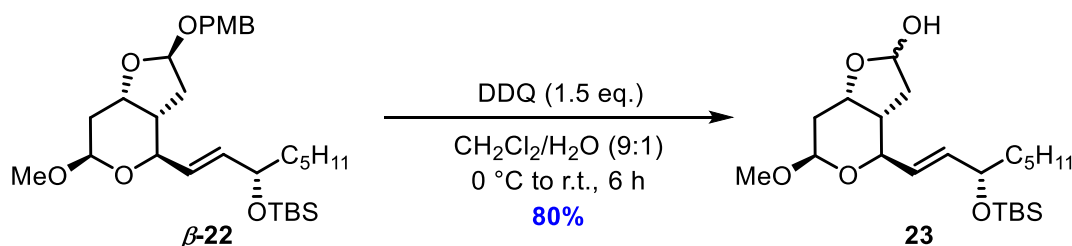

In a round-bottom flask, a solution of  $\beta$ -22 (320.9 mg, 0.60 mmol, 1.0 eq.) in degassed (N<sub>2</sub>) CH<sub>2</sub>Cl<sub>2</sub>/H<sub>2</sub>O (40.0 mL, 9:1 v/v) was cooled to 0 °C. Then, fresh recrystallized DDQ (177.1 mg, 0.78 mmol, 1.3 eq.) was added in one portion at 0 °C under N<sub>2</sub> atmosphere. After the reaction mixture was stirred for 3 h at r.t., DDQ (27.2 mg, 0.12 mmol, 0.2 eq.) was added and the mixture was stirred for another 3 h at r.t.. After completion of the reaction, the mixture was poured over saturated NaHCO<sub>3</sub> solution (30 mL) and extracted with CH<sub>2</sub>Cl<sub>2</sub> (3 × 30 mL). The organic phases were combined, washed with brine, dried over MgSO<sub>4</sub>, filtered and concentrated *in vacuo*. The crude product was purified by flash column chromatography on silica gel (Hexanes/EtOAc = 10:1 to 3:1) to give pure **23** (3.3:1 epimers, 200 mg, 0.48 mmol, 80%) as a pale-yellow oil.

*R*<sub>f</sub> = 0.17 (Hexanes/EtOAc = 3:1)

IR (thin film)  $\nu_{\text{max}}$ /cm<sup>-1</sup>: 3428, 2955, 2929, 2856, 1612, 1463, 1395, 1361, 1252, 1204, 1138, 1095, 1055, 1012, 970, 836, 811, 775.

<sup>1</sup>H NMR (400 MHz, CDCl<sub>3</sub>) *Epimer a*:  $\delta_H$  = 5.78 – 5.64 (m, 1H), 5.64 – 5.51 (m, 2H), 4.58 (dd, *J* = 9.3, 2.4 Hz, 1H), 4.48 (td, *J* = 4.2, 2.7 Hz, 1H), 4.17 – 4.02 (m, 1H), 3.59 (dd, *J* = 10.6, 6.9 Hz, 1H), 3.47 (s, 3H), 2.86 (s, 1H), 2.17 – 2.01 (m, 2H), 1.97 – 1.80 (m, 2H), 1.79 – 1.67 (m, 1H), 1.52 – 1.39 (m, 2H), 1.36 – 1.17 (m, 6H), 1.01 – 0.73 (m, 12H), 0.05 (s, 3H), 0.02 (s, 3H); *Epimer b*:  $\delta_H$  = 5.78 – 5.64 (m, 1H), 5.64 – 5.51 (m, 1H), 5.47 (dd, *J* = 6.0, 2.8 Hz, 1H),

4.68 (dd,  $J = 9.0, 2.4$  Hz, 1H), 4.31 – 4.20 (m, 2H), 4.17 – 4.02 (m, 1H), 3.49 (s, 3H), 3.13 (s, 1H), 2.17 – 2.01 (m, 2H), 1.97 – 1.80 (m, 2H), 1.79 – 1.67 (m, 1H), 1.52 – 1.39 (m, 2H), 1.36 – 1.17 (m, 6H), 1.01 – 0.73 (m, 12H), 0.05 (s, 3H), 0.03 (s, 3H).

$^{13}\text{C}$  NMR (125 MHz,  $\text{CDCl}_3$ ) Epimer *a* and *b*:  $\delta_{\text{C}} = 137.2, 137.1, 127.8, 127.4, 99.5, 99.3, 98.5, 97.8, 76.7, 76.3, 75.1, 73.0, 73.0, 56.3, 56.3, 41.6, 40.5, 38.3, 38.3, 36.9, 36.5, 33.7, 32.8, 31.9, 31.9, 26.1, 26.1, 25.1, 25.1, 22.8, 22.8, 18.4, 14.3, 14.2, -4.1, -4.1, -4.6, -4.6$ .

HRMS (ESI)  $m/z$ :  $[\text{M}+\text{Na}]^+$  Calcd. for  $\text{C}_{22}\text{H}_{42}\text{NaO}_5\text{Si}$  437.2694; Found 437.2709.

$[\alpha]_{\text{D}}^{24} = -52.24$  ( $c$  0.49,  $\text{CHCl}_3$ )

**(2*S*,3*aS*,4*R*,7*aS*)-4-((*S,E*)-3-((*tert*-Butyldimethylsilyl)oxy)oct-1-en-1-yl)-2-((4-methoxybenzyl)oxy)hexahydro-6*H*-furo[3,2-*c*]pyran-6-one ( $\alpha$ -15)**

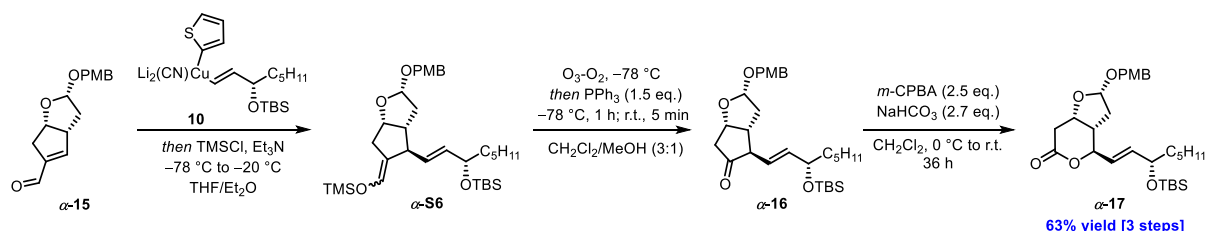

To a solution of **S5** (3.5 g, 10.8 mmol, 1.2 eq.) in  $\text{Et}_2\text{O}$  (43.2 mL) stirring at  $-78$  °C, *t*-BuLi (1.7 M in pentane, 12.7 mL, 21.6 mmol, 2.4 eq.) was added dropwise and the resulting pale yellow solution was stirred at  $-78$  °C for 2 h prior to warming to  $-40$  °C to stir for a further 2 h before cooling back to  $-78$  °C.

A separate solution of thiophene (866  $\mu\text{L}$ , 909 mg, 10.8 mmol, 1.2 eq.) in THF (43.2 mL) was prepared and cooled to  $-40$  °C and *n*-BuLi (1.6 M in hexanes, 6.8 mL, 10.8 mmol, 1.2 eq.) was added dropwise. The resulting colorless/very pale yellow, clear solution was stirred at  $-40$  °C for 45 min before cooling to  $-78$  °C whereupon CuCN (967 mg, 10.8 mmol, 1.2 eq.) was added in a single portion and the solution was warmed to r.t. The formed thienyl cuprate solution was then added to the above vinyl lithium solution at  $-78$  °C and THF (43.2 mL) was added (used for washing the flask). The bright yellow reaction mixture was warmed to  $-20$  °C to facilitate the formation of cuprate **10**. The reaction mixture was stirred at  $-20$  °C for 1 h before cooling back to  $-78$  °C.

A solution of  $\alpha$ -**15** (2.5 g, 9.0 mmol, 1.0 eq.) in THF (43.2 mL) was prepared and added to the solution of cuprate **10** at  $-78$  °C to give a bright orange reaction mixture. The reaction mixture was stirred at  $-78$  °C for 1 h before the sequential addition of TMSCl (5.7 mL, 4.9 g, 45.0 mmol, 5.0 eq.) and  $\text{Et}_3\text{N}$  (7.5 mL, 5.5 g, 54.0 mmol, 6.0 eq.). The reaction mixture was warmed to  $-20$  °C to stir for 20 min before quenching by addition of saturated aqueous  $\text{NH}_4\text{Cl}$  solution

(80 mL) and warming to r.t.. The aqueous phase was extracted with EtOAc (3 × 80 mL), the organic phases were then combined, washed further with saturated aqueous Na<sub>2</sub>S<sub>2</sub>O<sub>3</sub> solution (80 mL), washed with brine, dried over MgSO<sub>4</sub>, filtered and concentrated *in vacuo* to give crude  $\alpha$ -**S6** as a brown oil, which was used directly in the next step.

In a round-bottom flask, a solution of crude  $\alpha$ -**S6** in CH<sub>2</sub>Cl<sub>2</sub>/MeOH (72 mL, 3:1 v/v) was cooled to -78 °C and a stream of O<sub>3</sub>-O<sub>2</sub> (g) was bubbled through the reaction solution. The reaction progress was carefully monitored by TLC (Hexanes/EtOAc = 6:1) until a small amount of  $\alpha$ -**S6** remained (~7.0 min). The reaction mixture was then purged of O<sub>3</sub> (g) by bubbling N<sub>2</sub> (g) through the solution for 20 min followed by the addition of freshly ground PPh<sub>3</sub> (3.5 g, 13.5 mmol, 1.5 eq.). The reaction was stirred at -78 °C for 1 h before the dry ice/acetone bath was removed and the reaction was allowed to warm to r.t., at which point it was stirred for a further 5 min. The reaction mixture was then poured over saturated brine solution (80 mL) and extracted with EtOAc (3 × 80 mL). The organic phases were combined, dried over MgSO<sub>4</sub>, filtered and concentrated *in vacuo* to give crude  $\alpha$ -**16** as a brown oil, which was used directly in the next step.

In a round-bottom flask, a solution of crude  $\alpha$ -**16** in dry CH<sub>2</sub>Cl<sub>2</sub> (90 mL) was cooled to 0 °C. Then, *m*-CPBA (77% purity, 5.0 g, 22.5 mmol, 2.5 eq.) and NaHCO<sub>3</sub> (2.0 g, 24.3 mmol, 2.7 eq.) were added to the above mixture at 0 °C under N<sub>2</sub> atmosphere, and the mixture was stirred for 36 h at r.t. The reaction mixture was diluted with EtOAc and poured over saturated brine solution (80 mL) and extracted with EtOAc (3 × 80 mL). The organic phases were combined, dried over MgSO<sub>4</sub>, filtered and concentrated *in vacuo*. The crude product was purified by flash column chromatography on silica gel (Hexanes/EtOAc = 10:1 to 4:1) to give pure  $\alpha$ -**17** (2.95 g, 5.7 mmol, 63%) as a colorless oil.

**R<sub>f</sub>** = 0.31 (Hexanes/EtOAc = 4:1)

**IR** (thin film)  $\nu_{\text{max}}/\text{cm}^{-1}$ : 2954, 2930, 2857, 1754, 1613, 1514, 1463, 1348, 1301, 1248, 1082, 1029, 970, 835, 775.

**<sup>1</sup>H NMR** (400 MHz, CDCl<sub>3</sub>)  $\delta_{\text{H}}$  = 7.25 – 7.19 (m, 2H), 6.96 – 6.81 (m, 2H), 5.84 (ddd, *J* = 15.4, 5.5, 0.9 Hz, 1H), 5.61 (ddd, *J* = 15.5, 7.4, 1.3 Hz, 1H), 5.21 (d, *J* = 4.9 Hz, 1H), 4.92 (dd, *J* = 10.7, 7.4 Hz, 1H), 4.67 (d, *J* = 11.6 Hz, 1H), 4.57 (td, *J* = 8.9, 6.9 Hz, 1H), 4.44 (d, *J* = 11.5 Hz, 1H), 4.18 – 4.07 (m, 1H), 3.81 (s, 3H), 3.05 (dd, *J* = 14.5, 6.9 Hz, 1H), 2.73 (dd, *J* = 14.5, 9.3 Hz, 1H), 2.48 (tdd, *J* = 10.1, 8.4, 1.3 Hz, 1H), 2.15 (ddd, *J* = 13.7, 10.1, 5.0 Hz, 1H), 1.95 – 1.83 (m, 1H), 1.53 – 1.40 (m, 2H), 1.37 – 1.22 (m, 6H), 0.94 – 0.83 (m, 12H), 0.05 (s, 3H), 0.01 (s, 3H).



**<sup>13</sup>C NMR** (100 MHz, CDCl<sub>3</sub>)  $\delta_C$  = 171.1, 159.5, 139.7, 129.6, 129.5, 124.7, 114.1, 103.8, 80.6, 75.7, 72.4, 69.0, 55.4, 42.5, 38.1, 37.9, 35.5, 31.9, 26.0, 24.9, 22.7, 18.4, 14.2, -4.2, -4.7.

**HRMS** (ESI)  $m/z$ : [M+ NH<sub>4</sub>]<sup>+</sup> Calcd. for C<sub>29</sub>H<sub>50</sub>NO<sub>6</sub>Si 536.3136; Found 536.3129.

$[\alpha]_D^{25}$  = +106.3 ( $c$  1.00, CHCl<sub>3</sub>)

**(2*S*,3*aS*,4*R*,7*aS*)-4-((*S,E*)-3-((*tert*-Butyldimethylsilyl)oxy)oct-1-en-1-yl)-2-((4-methoxybenzyl)oxy)hexahydro-4*H*-furo[3,2-*c*]pyran-6-ol ( $\alpha$ -21)**

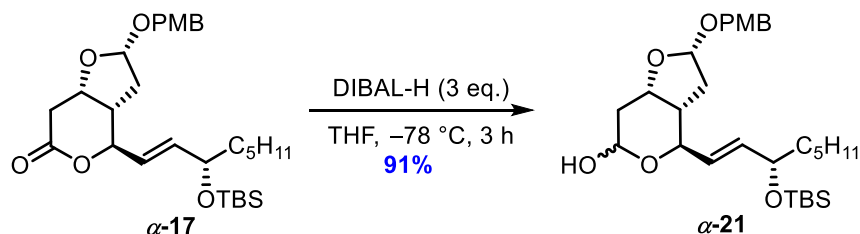

To a solution of  $\alpha$ -**17** (259.4 mg, 0.50 mmol, 1.0 eq.) in dry THF (5.0 mL) at  $-78$  °C under N<sub>2</sub> atmosphere, diisobutylaluminium hydride (1.0 M in hexanes, 1.5 mL, 1.5 mmol, 3.0 eq.) was added dropwisely. The reaction mixture was stirred at  $-78$  °C for 3 h and quenched by addition of saturated potassium sodium tartrate solution (5.0 mL). The reaction mixture was warmed to r.t., and stirred for 30 min at r.t.. The aqueous phase was extracted with EtOAc (3  $\times$  5 mL). The organic phases were combined, washed with brine, dried over MgSO<sub>4</sub>, filtered and concentrated *in vacuo*. The crude product was purified by flash column chromatography on silica gel (Hexanes/EtOAc = 9:1 to 3:1) to give pure  $\alpha$ -**21** (1.4:1 epimers, 235.9 mg, 0.45 mmol, 91%) as a colorless oil.

$R_f$  = 0.28 (Hexanes/EtOAc = 3:1)

**IR** (thin film)  $\nu_{\max}/\text{cm}^{-1}$ : 3418, 2955, 2931, 2858, 1614, 1514, 1463, 1359, 1302, 1249, 1173, 1110, 1058, 1033, 978, 835, 775.

**<sup>1</sup>H NMR** (400 MHz, CDCl<sub>3</sub>) *Epimer a*:  $\delta_H$  = 7.30 – 7.19 (m, 2H), 6.92 – 6.78 (m, 2H), 5.80 – 5.66 (m, 1H), 5.63 – 5.47 (m, 1H), 5.20 – 5.09 (m, 1H), 5.04 (ddd,  $J$  = 9.1, 5.2, 2.3 Hz, 1H), 4.77 – 4.66 (m, 1H), 4.48 – 4.31 (m, 2H), 4.27 (td,  $J$  = 4.4, 2.9 Hz, 1H), 4.12 – 4.00 (m, 2H), 3.77 (s, 3H), 2.28 – 1.95 (m, 3H), 1.94 – 1.87 (m, 1H), 1.83 – 1.70 (m, 1H), 1.51 – 1.38 (m, 2H), 1.35 – 1.18 (m, 6H), 0.87 (d,  $J$  = 6.9 Hz, 12H), 0.03 (s, 3H), 0.01 (s, 3H); *Epimer b*:  $\delta_H$  = 7.30 – 7.19 (m, 2H), 6.92 – 6.78 (m, 2H), 5.80 – 5.66 (m, 1H), 5.63 – 5.47 (m, 1H), 5.24 (dt,  $J$  = 9.0, 3.5 Hz, 1H), 5.20 – 5.09 (m, 1H), 4.77 – 4.66 (m, 1H), 4.63 (dd,  $J$  = 10.5, 6.9 Hz, 1H), 4.48 – 4.31 (m, 2H), 4.20 (q,  $J$  = 4.5 Hz, 1H), 4.12 – 4.00 (m, 1H), 3.77 (s, 3H), 2.28 – 1.95

(m, 3H), 1.83 – 1.70 (m, 2H), 1.51 – 1.38 (m, 2H), 1.35 – 1.18 (m, 6H), 0.87 (d,  $J$  = 6.9 Hz, 12H), 0.03 (s, 3H), 0.00 (s, 3H).

$^{13}\text{C}$  NMR (100 MHz,  $\text{CDCl}_3$ ) *Epimer a* and *b*:  $\delta_{\text{C}}$  = 159.3, 159.1, 136.8, 136.78, 130.1, 129.6, 129.5, 129.2, 127.7, 127.5, 113.9, 113.8, 103.7, 102.8, 92.6, 91.4, 77.9, 76.1, 76.0, 72.7, 72.7, 70.2, 69.1, 68.4, 55.2, 40.2, 40.0, 38.2, 36.2, 35.6, 34.9, 32.4, 31.8, 25.9, 25.0, 22.6, 18.3, 14.1, -4.2, -4.8, -4.8.

HRMS (ESI)  $m/z$ :  $[\text{M}+\text{Na}]^+$  Calcd. for  $\text{C}_{29}\text{H}_{48}\text{NaO}_6\text{Si}$  543.3112; Found 543.3122.

$[\alpha]_{\text{D}}^{24}$  = +54.83 ( $c$  2.00,  $\text{CHCl}_3$ )

***tert*-Butyl(((*S,E*)-1-((2*S*,3*aS*,4*R*,6*R*,7*aS*)-6-methoxy-2-((4-methoxybenzyl)oxy)hexahydro-4*H*-furo[3,2-*c*]pyran-4-yl)oct-1-en-3-yl)oxy)dimethylsilane ( $\alpha$ -22)**

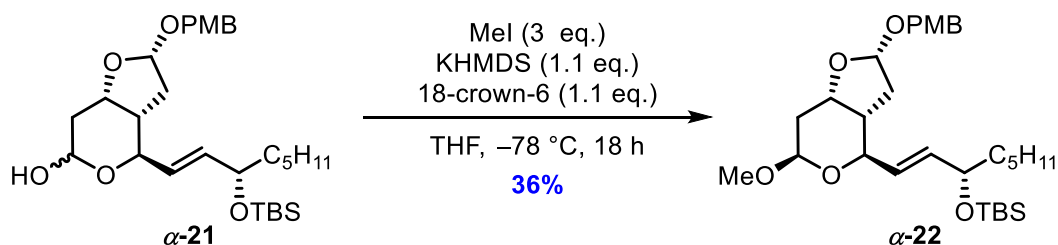

In an oven-dried Schlenk tube, KHMDS (1.0 M in THF, 0.32 mL, 0.317 mmol, 1.1 eq.) was added to a solution of lactol  $\alpha$ -21 (150.0 mg, 0.288 mmol, 1.0 eq.) in dry THF (1.7 mL) at  $-78^\circ\text{C}$  under  $\text{N}_2$  atmosphere, and the reaction mixture was stirred at this temperature for 40 min. Then a solution of 18-crown-6 (83.8 mg, 0.317 mmol, 1.1 eq.) in dry THF (0.6 mL) was added slowly to the above mixture at  $-78^\circ\text{C}$ . After stirring for 40 min at  $-78^\circ\text{C}$ , methyl iodide (54  $\mu\text{L}$ , 122.6 mg, 0.864 mmol, 3.0 eq.) was added and the reaction mixture was stirred at  $-78^\circ\text{C}$  for 20 h. The mixture was quenched by the addition of water (5 mL), and the aqueous phase was extracted with EtOAc ( $3 \times 5$  mL). The organic phases were combined, washed with brine, dried over  $\text{MgSO}_4$ , filtered and concentrated *in vacuo*. The crude product was purified by flash column chromatography on silica gel (Hexanes/EtOAc = 15:1 to 8:1) to give pure  $\alpha$ -22 (55.5 mg, 0.104 mmol, 36%) as a colorless oil.

$R_{\text{f}}$  = 0.24 (Hexanes/EtOAc = 8:1)

IR (thin film)  $\nu_{\text{max}}/\text{cm}^{-1}$ : 2954, 2929, 2857, 1614, 1514, 1463, 1361, 1301, 1249, 1207, 1173, 1136, 1054, 1034, 967, 835, 775.

$^1\text{H}$  NMR (400 MHz,  $\text{CDCl}_3$ )  $\delta_{\text{H}}$  = 7.27 – 7.22 (m, 2H), 6.97 – 6.75 (m, 2H), 5.67 (ddd,  $J$  = 15.4, 6.1, 0.8 Hz, 1H), 5.52 (ddd,  $J$  = 15.4, 7.0, 1.0 Hz, 1H), 5.11 (dd,  $J$  = 6.1, 1.0 Hz, 1H), 4.70 (d,  $J$  = 11.6 Hz, 1H), 4.57 (dd,  $J$  = 8.8, 2.3 Hz, 1H), 4.41 (d,  $J$  = 11.6 Hz, 1H), 4.30 – 4.20

(m, 2H), 4.11 – 4.03 (m, 1H), 3.78 (s, 3H), 3.44 (s, 3H), 2.12 (dt,  $J = 14.2, 2.7$  Hz, 1H), 2.05 (ddd,  $J = 13.7, 7.5, 6.2$  Hz, 1H), 1.90 (ddd,  $J = 10.5, 7.3, 4.9$  Hz, 1H), 1.81 – 1.68 (m, 2H), 1.52 – 1.38 (m, 2H), 1.34 – 1.20 (m, 6H), 0.89 – 0.80 (m, 12H), 0.02 (s, 3H), 0.00 (s, 3H).

$^{13}\text{C}$  NMR (125 MHz,  $\text{CDCl}_3$ )  $\delta_{\text{C}} = 159.2, 136.8, 130.4, 129.3, 128.0, 113.9, 103.1, 99.4, 77.8, 75.9, 73.1, 69.4, 56.2, 55.4, 40.3, 38.2, 35.7, 33.9, 31.9, 26.1, 25.1, 22.8, 18.4, 14.2, -4.1, -4.6$ .

HRMS (ESI)  $m/z$ :  $[\text{M}+\text{Na}]^+$  Calcd. for  $\text{C}_{30}\text{H}_{50}\text{NaO}_6\text{Si}$  557.3269; Found 557.3287.

$[\alpha]_{\text{D}}^{24} = +55.02$  ( $c$  0.83,  $\text{CHCl}_3$ )

**(3a*S*,4*R*,6*R*,7a*S*)-4-((*S,E*)-3-((*tert*-Butyldimethylsilyl)oxy)oct-1-en-1-yl)-6-methoxyhexahydro-4*H*-furo[3,2-*c*]pyran-2-ol (23, from  $\alpha$ -22)**

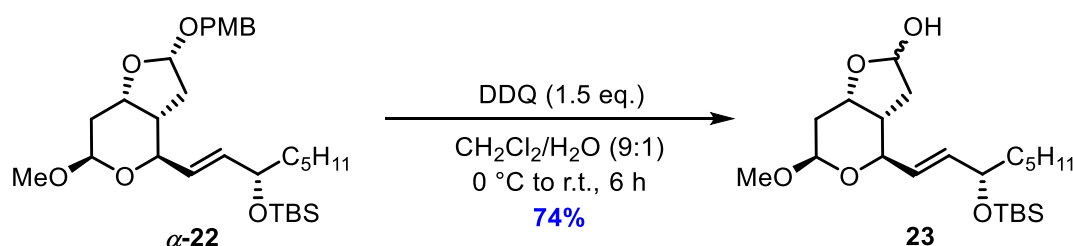

In a round-bottom flask, a solution of  $\alpha$ -22 (27.0 mg, 50.5  $\mu\text{mol}$ , 1.0 eq.) in degassed ( $\text{N}_2$ )  $\text{CH}_2\text{Cl}_2/\text{H}_2\text{O}$  (3.4 mL, 9:1  $v/v$ ) was cooled to 0  $^\circ\text{C}$ . Then, fresh recrystallized DDQ (14.9 mg, 65.7  $\mu\text{mol}$ , 1.3 eq.) was added in one portion at 0  $^\circ\text{C}$  under  $\text{N}_2$  atmosphere. After the reaction mixture was stirred for 3 h at r.t., DDQ (2.3 mg, 10.1  $\mu\text{mol}$ , 0.2 eq.) was added and the mixture was stirred for another 3 h at r.t.. After completion of the reaction, the mixture was poured over saturated  $\text{NaHCO}_3$  solution (5 mL) and extracted with  $\text{CH}_2\text{Cl}_2$  ( $3 \times 10$  mL). The organic phases were combined, washed with brine, dried over  $\text{MgSO}_4$ , filtered and concentrated *in vacuo*. The crude product was purified by flash column chromatography on silica gel (Hexanes/EtOAc = 10:1 to 3:1) to give pure **23** (3.2:1 epimers, 15.5 mg, 37.4  $\mu\text{mol}$ , 74%) as a pale-yellow oil.

$R_f = 0.17$  (Hexanes/EtOAc = 3:1)

$^1\text{H}$  NMR (400 MHz,  $\text{CDCl}_3$ ) *Epimer a*:  $\delta_{\text{H}} = 5.78 - 5.64$  (m, 1H), 5.64 – 5.51 (m, 2H), 4.58 (dd,  $J = 9.3, 2.4$  Hz, 1H), 4.48 (td,  $J = 4.2, 2.7$  Hz, 1H), 4.16 – 4.03 (m, 1H), 3.59 (dd,  $J = 10.6, 6.9$  Hz, 1H), 3.47 (s, 3H), 2.76 (d,  $J = 3.2$  Hz, 3H), 2.19 – 2.01 (m, 2H), 1.99 – 1.81 (m, 2H), 1.80 – 1.68 (m, 1H), 1.54 – 1.40 (m, 2H), 1.35 – 1.23 (m, 6H), 0.95 – 0.84 (m, 12H), 0.05 (s, 3H), 0.03 (s, 3H); *Epimer b*:  $\delta_{\text{H}} = 5.78 - 5.64$  (m, 1H), 5.64 – 5.51 (m, 1H), 5.47 (dd,  $J = 5.7, 3.4$  Hz, 1H), 4.69 (dd,  $J = 9.0, 2.4$  Hz, 1H), 4.30 – 4.19 (m, 2H), 4.15 – 4.03 (m, 1H), 3.49 (s,

3H), 3.00 (d,  $J = 3.4$  Hz, 1H), 2.19 – 2.01 (m, 2H), 1.99 – 1.81 (m, 2H), 1.80 – 1.68 (m, 1H), 1.54 – 1.40 (m, 2H), 1.35 – 1.23 (m, 6H), 0.95 – 0.84 (m, 12H), 0.05 (s, 3H), 0.03 (s, 3H).

**HRMS** (ESI)  $m/z$ :  $[M+Na]^+$  Calcd. for  $C_{22}H_{42}NaO_5Si$  437.2694; Found 437.2707.

$[\alpha]_D^{24} = -52.02$  ( $c$  0.62,  $CHCl_3$ )

**(Z)-7-((2R,3S,4S,6R)-2-((S,E)-3-((tert-Butyldimethylsilyl)oxy)oct-1-en-1-yl)-4-hydroxy-6-methoxytetrahydro-2H-pyran-3-yl)hept-5-enoic acid (25)**

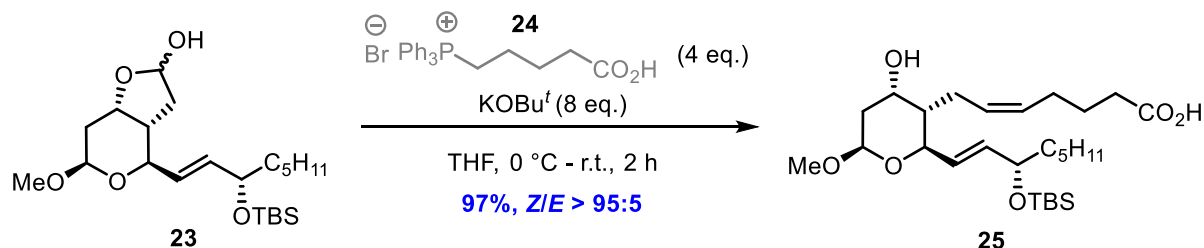

KOBu<sup>t</sup> (1.0 M in THF, 3.4 mL, 3.36 mmol, 8.0 eq.) was added to a stirring suspension of (4-carboxybutyl)triphenylphosphonium bromide (744.8 mg, 1.68 mmol, 4.0 eq.) in THF (8.4 mL) at 0 °C under N<sub>2</sub> atmosphere. The resulting orange suspension was stirred at 0 °C for 1 h. Lactol **23** (174.2 mg, 0.42 mmol, 1.0 eq.) was added as a solution in THF (2.8 mL) to the orange suspension and the reaction was stirred at 0 °C for 2 h. The reaction mixture was quenched by addition of water (10 mL), adjusted to pH 3.0 by addition of 0.1 N aqueous HCl in ice bath, and extracted with EtOAc (3 × 20 mL). The combined organic phases were washed with brine, dried over MgSO<sub>4</sub>, filtered and concentrated *in vacuo*. The crude product ( $Z/E > 95:5$ ) was purified by flash column chromatography on silica gel (Hexanes/EtOAc = 10:1 with 1% AcOH to Hexanes/EtOAc = 2:1 with 1% AcOH) to give pure **25** (203.7 mg, 0.41 mmol, 97%) as a colorless oil.

$R_f = 0.27$  (Hexanes/EtOAc = 2:1 with 1% AcOH)

**IR** (thin film)  $\nu_{max}/cm^{-1}$ : 3480, 2954, 2929, 2856, 1709, 1452, 1394, 1360, 1251, 1199, 1137, 1087, 1059, 1031, 969, 889, 835, 775.

**<sup>1</sup>H NMR** (400 MHz, CDCl<sub>3</sub>)  $\delta_H$  = 5.68 (dd,  $J = 15.4, 6.3$  Hz, 1H), 5.55 (ddd,  $J = 15.4, 7.8, 0.9$  Hz, 1H), 5.45 – 5.31 (m, 2H), 4.74 (dd,  $J = 9.7, 2.1$  Hz, 1H), 4.20 – 4.06 (m, 2H), 4.03 (dd,  $J = 10.3, 7.8$  Hz, 1H), 3.47 (s, 3H), 2.35 (td,  $J = 7.2, 3.2$  Hz, 2H), 2.16 (dt,  $J = 14.2, 7.1$  Hz, 1H), 2.12 – 1.83 (m, 4H), 1.75 – 1.56 (m, 3H), 1.56 – 1.39 (m, 3H), 1.37 – 1.18 (m, 6H), 0.88 (s, 12H), 0.05 (s, 3H), 0.03 (s, 3H).

**<sup>13</sup>C NMR** (100 MHz, CDCl<sub>3</sub>)  $\delta_C$  = 178.9, 137.9, 130.6, 128.3, 128.3, 98.9, 75.6, 73.2, 66.3, 56.3, 44.8, 39.4, 38.2, 33.3, 31.9, 26.6, 26.1, 25.1, 24.8, 24.7, 22.7, 18.4, 14.1, -4.1, -4.6.

**HRMS** (ESI)  $m/z$ :  $[M+Na]^+$  Calcd. for  $C_{27}H_{50}NaO_6Si$  521.3269; Found 521.3251.

$[\alpha]_D^{24} = +1.33$  ( $c$  1.00,  $CHCl_3$ )

**(Z)-7-((2R,3S,4S,6R)-4-Hydroxy-2-((S,E)-3-hydroxyoct-1-en-1-yl)-6-methoxytetrahydro-2H-pyran-3-yl)hept-5-enoic acid (26)**

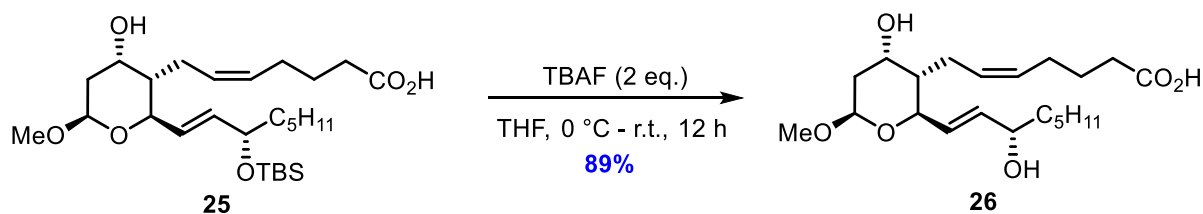

To a solution of **25** (43.0 mg, 86.2  $\mu$ mol, 1.0 eq.) in dry THF (0.86 mL) at 0 °C under  $N_2$  atmosphere, TBAF (1.0 M in THF, 170  $\mu$ L, 172  $\mu$ mol, 2.0 eq.) was added dropwisely and the resulting reaction mixture was stirred for 10 min at 0 °C. Then, the mixture was warmed to r.t. and stirred for another 12 h. The mixture was poured over brine and extracted with EtOAc (3  $\times$  5 mL). The organic phases were combined, dried over  $MgSO_4$ , filtered and concentrated *in vacuo*. The crude product was purified by flash column chromatography on silica gel (Hexanes/EtOAc = 10:1 with 1% AcOH to Hexanes/EtOAc = 1:2 with 1% AcOH) to give pure **26** (29.4 mg, 76.5  $\mu$ mol, 89%) as a colorless oil.

$R_f$  = 0.39 (Hexanes/EtOAc = 1:2 with 1% AcOH)

**IR** (thin film)  $\nu_{max}/cm^{-1}$ : 3418, 2954, 2925, 2855, 1709, 1550, 1449, 1395, 1378, 1346, 1242, 1197, 1136, 1087, 1059, 1027, 971, 912, 886, 713.

**$^1H$  NMR** (400 MHz,  $CDCl_3$ )  $\delta_H$  = 5.79 (dd,  $J$  = 15.6, 5.7 Hz, 1H), 5.69 (ddd,  $J$  = 15.6, 7.3, 1.0 Hz, 1H), 5.49 – 5.36 (m, 2H), 4.76 (dd,  $J$  = 9.8, 2.1 Hz, 1H), 4.74 (br. s, 2H), 4.21 – 4.14 (m, 2H), 4.06 (dd,  $J$  = 10.3, 7.3 Hz, 1H), 3.48 (s, 3H), 2.33 (dd,  $J$  = 7.3, 6.1 Hz, 2H), 2.18 – 2.07 (m, 2H), 2.06 – 1.90 (m, 3H), 1.75 – 1.58 (m, 3H), 1.58 – 1.48 (m, 2H), 1.48 – 1.37 (m, 2H), 1.34 – 1.24 (m, 5H), 0.87 (t,  $J$  = 6.8 Hz, 3H).

**$^{13}C$  NMR** (100 MHz,  $CDCl_3$ )  $\delta_C$  = 177.5, 136.4, 130.8, 129.2, 127.8, 99.1, 75.3, 72.4, 66.0, 56.5, 45.2, 39.3, 36.9, 32.9, 31.8, 26.5, 25.2, 24.6, 24.4, 22.7, 14.1.

**HRMS** (ESI)  $m/z$ :  $[M+Na]^+$  Calcd. for  $C_{21}H_{36}NaO_6$  407.2404; Found 407.2400.

$[\alpha]_D^{25} = +20.00$  ( $c$  0.70,  $CHCl_3$ )

**(Z)-7-((2R,3S,4S)-4,6-Dihydroxy-2-((S,E)-3-hydroxyoct-1-en-1-yl)tetrahydro-2H-pyran-3-yl)hept-5-enoic acid (TxB<sub>2</sub>,1)**

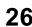

**TxB<sub>2</sub> (1)**

**Mp** 91 – 94 °C

$$R_f = 0.21 \text{ (Hexanes/EtOAc = 1:3 with 1\% AcOH)}$$

**IR** (thin film)  $\nu_{\text{max}}/\text{cm}^{-1}$ : 3430, 2955, 2926, 2856, 1707, 1550, 1449, 1396, 1379, 1348, 1248, 1197, 1087, 1059, 1027, 974, 887, 716.

**HRMS (ESI) m/z:** [M+Na]<sup>+</sup> Calcd. for C<sub>20</sub>H<sub>34</sub>NaO<sub>6</sub> 393.2248; Found 393.2246.

**[α]<sub>D</sub><sup>24</sup> = +57.10 (c 1.0, EtOH)**

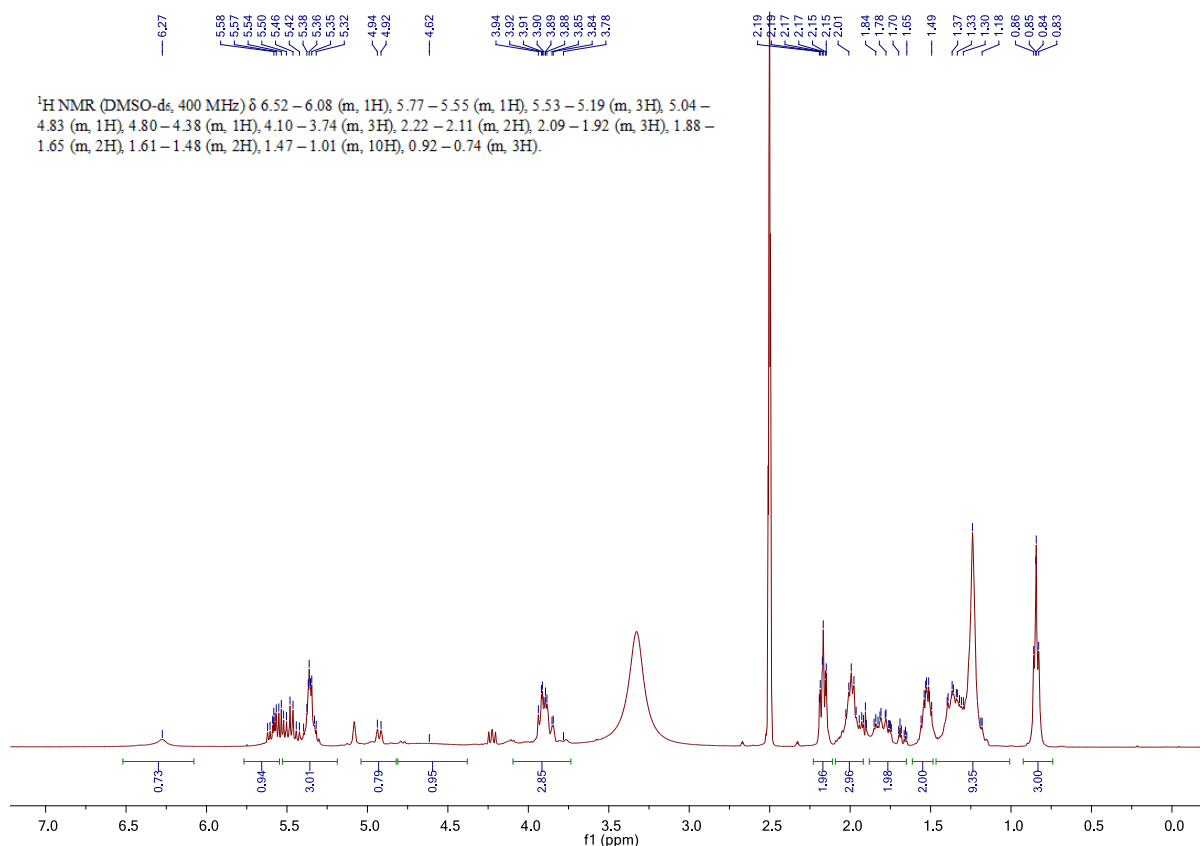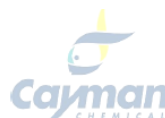

**Thromboxane B2**

**Item #19030**

**Batch #0456533**

|                 |                                                                                                                             |                        |                |
|-----------------|-----------------------------------------------------------------------------------------------------------------------------|------------------------|----------------|
| Date            | Apr 27 2018                                                                                                                 |                        |                |
| File Name       | \\sulfur\private\inmrd\2018\SMC-19030-0456533_20180427_1SMC-19030-0456533_20180427_01SMC-19030-0456533_20180427_001.fid.tif |                        |                |
| Frequency (MHz) | 399.9680                                                                                                                    | Nucleus                | <sup>1</sup> H |
| Solvent         | DMSO-d6                                                                                                                     | Temperature (degree C) | 25.000         |
|                 |                                                                                                                             | Number of Transients   | 32             |

<sup>1</sup>H NMR (DMSO-d<sub>6</sub>, 400 MHz) δ 6.2-6.3 (m, 1H), 5.5-5.6 (m, 1H), 5.3-5.5 (m, 3H), 4.9-5.0 (m, 1H), 4.5-4.8 (m, 1H), 3.8-3.9 (m, 3H), 2.1-2.2 (m, 2H), 1.9-2.1 (m, 3H), 1.6-1.9 (m, 2H), 1.4-1.6 (m, 2H), 1.1-1.4 (m, 10H), 0.8-0.9 (m, 3H)

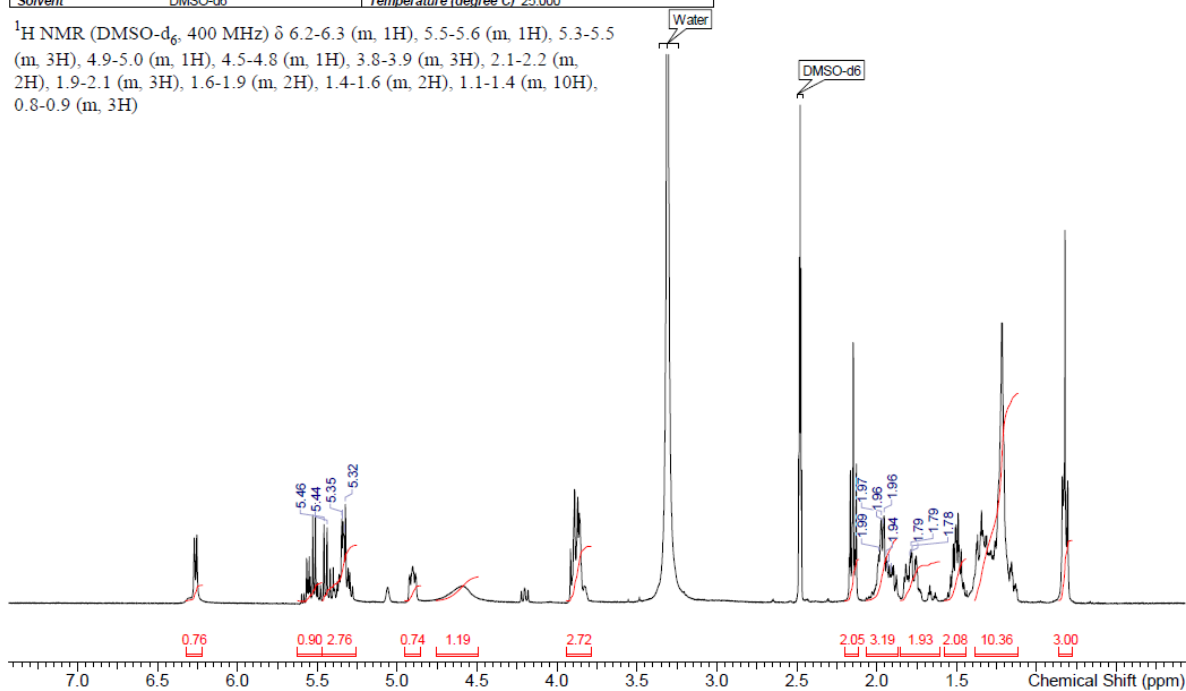

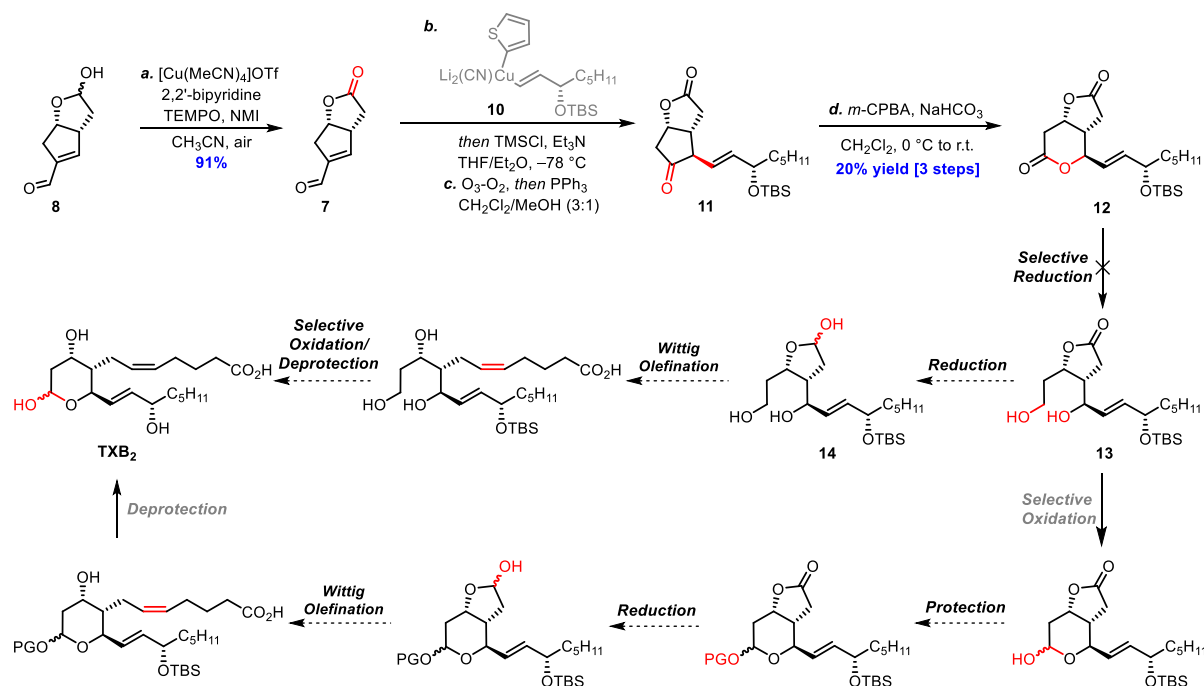

**Scheme S2. Possible routes and attempts to thromboxane B<sub>2</sub> via the formation of dilactone 12.**

**Reagents and conditions:** (a) [Cu(MeCN)<sub>4</sub>]OTf (5 mol %), 2'-Bipyridine (5 mol %), TEMPO (5 mol %), NMI (10 mol %), CH<sub>3</sub>CN, Air, r.t., overnight, 91% yield. (b) Cuprate **10** (1.2 eq.), THF/Et<sub>2</sub>O, −78 °C; then TMSCl (5 eq.), Et<sub>3</sub>N (6 eq.), −78 °C to −20 °C. (c) O<sub>3</sub>-O<sub>2</sub>, CH<sub>2</sub>Cl<sub>2</sub>/MeOH (v/v, 3:1), −78 °C; then PPh<sub>3</sub> (1.5 eq.). (d) *m*-CPBA (2.5 eq.), NaHCO<sub>3</sub> (2.7 eq.), CH<sub>2</sub>Cl<sub>2</sub>, 0 °C to r.t., 36 h, 20% yield, 3 steps. TEMPO, 2,2,6,6-tetramethyl-1-piperidinyloxy. NMI, *N*-methylimidazole. TBS, *tert*-butyldimethylsilyl. TMS, trimethylsilyl. *m*-CPBA, *m*-chloroperoxybenzoic acid. DDQ, 2,3-dichloro-5,6-dicyano-1,4-benzoquinone.

**(3a*S*,4*R*,7a*S*)-4-((*S,E*)-3-((*tert*-Butyldimethylsilyl)oxy)oct-1-en-1-yl)tetrahydro-4*H*-furo[3,2-*c*]pyran-2,6-dione (**12**)**

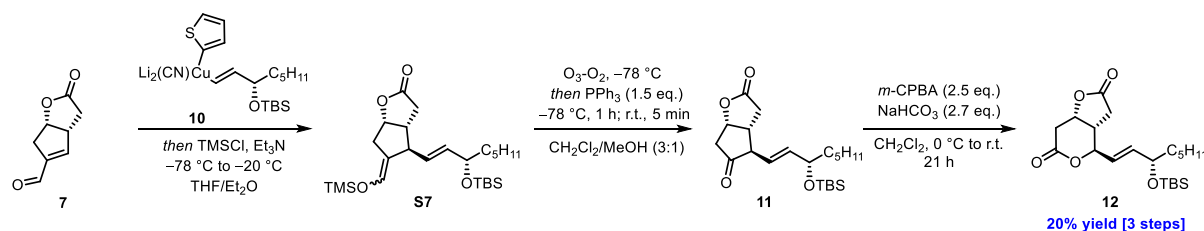

To a solution of **S5** (772.0 mg, 2.4 mmol, 1.2 eq.) in Et<sub>2</sub>O (9.6 mL) stirring at −78 °C, *t*-BuLi (1.7 M in pentane, 2.8 mL, 4.8 mmol, 2.4 eq.) was added dropwise and the resulting pale yellow solution was stirred at −78 °C for 2 h prior to warming to −40 °C to stir for a further 2 h before cooling back to −78 °C.

A separate solution of thiophene (192 μL, 202.4 mg, 2.4 mmol, 1.2 eq.) in THF (9.6 mL) was prepared and cooled to −40 °C and *n*-BuLi (1.6 M in hexanes, 1.5 mL, 2.4 mmol, 1.2 eq.) was added dropwise. The resulting colorless/very pale yellow, clear solution was stirred at −40 °C for 45 min before cooling to −78 °C whereupon CuCN (215.2 mg, 2.4 mmol, 1.2 eq.) was



added in a single portion and the solution was warmed to r.t. The formed thienyl cuprate solution was then added to the above vinyl lithium solution at  $-78\text{ }^{\circ}\text{C}$  and THF (9.6 mL) was added (used for washing the flask). The bright yellow reaction mixture was warmed to  $-20\text{ }^{\circ}\text{C}$  to facilitate the formation of cuprate **10**. The reaction mixture was stirred at  $-20\text{ }^{\circ}\text{C}$  for 1 h before cooling back to  $-78\text{ }^{\circ}\text{C}$ .

A solution of **7** (304.3 mg, 2.0 mmol, 1.0 eq.) in THF (9.6 mL) was prepared and added to the solution of cuprate **10** at  $-78\text{ }^{\circ}\text{C}$  to give a bright orange reaction mixture. The reaction mixture was stirred at  $-78\text{ }^{\circ}\text{C}$  for 1 h before the sequential addition of TMSCl (1.3 mL, 1.09 g, 10.0 mmol, 5.0 eq.) and  $\text{NEt}_3$  (1.7 mL, 1.22 g, 12.0 mmol, 6.0 eq.). The reaction mixture was warmed to  $-20\text{ }^{\circ}\text{C}$  to stir for 20 min before quenching by addition of saturated aqueous  $\text{NH}_4\text{Cl}$  solution (24 mL) and warming to r.t.. The aqueous phase was extracted with EtOAc ( $3 \times 24\text{ mL}$ ), the organic phases were then combined, washed further with saturated aqueous  $\text{Na}_2\text{S}_2\text{O}_3$  solution (24 mL), washed with brine, dried over  $\text{MgSO}_4$ , filtered and concentrated *in vacuo* to give crude **S7** as a brown oil, which was used directly in the next step.

In a round-bottom flask, a solution of crude **S7** in  $\text{CH}_2\text{Cl}_2/\text{MeOH}$  (16 mL, 3:1 v/v) was cooled to  $-78\text{ }^{\circ}\text{C}$  and a stream of  $\text{O}_3\text{-O}_2$  (g) was bubbled through the reaction solution. The reaction progress was carefully monitored by TLC (Hexanes/EtOAc = 6:1) until a small amount of **S7** remained ( $\sim 6.0\text{ min}$ ). The reaction mixture was then purged of  $\text{O}_3$  (g) by bubbling  $\text{N}_2$  (g) through the solution for 20 min followed by the addition of freshly ground  $\text{PPh}_3$  (786.9 mg, 3.0 mmol, 1.5 eq.). The reaction was stirred at  $-78\text{ }^{\circ}\text{C}$  for 1 h before the dry ice/acetone bath was removed and the reaction was allowed to warm to r.t., at which point it was stirred for a further 5 min. The reaction mixture was then poured over saturated brine solution (24 mL) and extracted with EtOAc ( $3 \times 24\text{ mL}$ ). The organic phases were combined, dried over  $\text{MgSO}_4$ , filtered and concentrated *in vacuo* to give crude **11** as a brown oil, which was used directly in the next step.

In a round-bottom flask, a solution of crude **11** in dry  $\text{CH}_2\text{Cl}_2$  (20 mL) was cooled to  $0\text{ }^{\circ}\text{C}$ . Then, *m*-CPBA (77% purity, 1.12 g, 5.0 mmol, 2.5 eq.) and  $\text{NaHCO}_3$  (453.7 mg, 5.4 mmol, 2.7 eq.) were added to the above mixture at  $0\text{ }^{\circ}\text{C}$  under  $\text{N}_2$  atmosphere, and the mixture was stirred for 21 h at r.t. The reaction mixture was diluted with EtOAc and poured over water (24 mL) and extracted with EtOAc ( $3 \times 24\text{ mL}$ ). The organic phases were combined, washed with 5%  $\text{Na}_2\text{S}_2\text{O}_3$  solution (18 mL), 5%  $\text{Na}_2\text{CO}_3$  solution (18 mL), saturated brine solution (18 mL), dried over  $\text{MgSO}_4$ , filtered and concentrated *in vacuo*. The crude product was purified by flash column chromatography on silica gel (Hexanes/EtOAc = 10:1 to 2:1) to give pure **12** (158.6 g, 0.4 mmol, 20%) as a colorless oil.



poured over saturated NaHCO<sub>3</sub> solution (30 mL) and extracted with CH<sub>2</sub>Cl<sub>2</sub> (3 × 30 mL). The organic phases were combined, washed with brine, dried over MgSO<sub>4</sub>, filtered and concentrated *in vacuo*. The crude product was purified by flash column chromatography on silica gel (Hexanes/EtOAc = 9:1 to 7:3) to give pure **18** (1.6:1 epimers, 345.5 mg, 0.87 mmol, 81%) as a pale-yellow oil.

**R<sub>f</sub>** = 0.31 (Hexanes/EtOAc = 7:3)

**IR** (thin film)  $\nu_{\text{max}}/\text{cm}^{-1}$ : 3419, 2954, 2929, 2857, 1748, 1471, 1463, 1359, 1251, 1145, 1082, 1014, 971, 861, 835, 809, 775.

**<sup>1</sup>H NMR** (400 MHz, CDCl<sub>3</sub>) *Epimer a*:  $\delta_{\text{H}}$  = 5.97 – 5.79 (m, 1H), 5.74 – 5.46 (m, 2H), 4.65 (q, *J* = 7.5 Hz, 1H), 4.61 – 4.46 (m, 1H), 4.23 – 4.07 (m, 1H), 3.11 – 2.94 (m, 1H), 2.91 – 2.75 (m, 1H), 2.68 (qd, *J* = 8.8, 7.0 Hz, 1H), 2.59 (dd, *J* = 15.4, 7.5 Hz, 1H), 2.20 – 2.04 (m, 1H), 1.76 (dt, *J* = 12.8, 6.1 Hz, 1H), 1.55 – 1.42 (m, 2H), 1.36 – 1.22 (m, 6H), 0.98 – 0.78 (m, 12H), 0.04 (s, 2H), 0.01 (s, 2H); *Epimer b*:  $\delta_{\text{H}}$  = 5.97 – 5.79 (m, 1H), 5.74 – 5.46 (m, 2H), 5.01 (dd, *J* = 10.7, 7.5 Hz, 1H), 4.61 – 4.46 (m, 1H), 4.23 – 4.07 (m, 1H), 3.11 – 2.94 (m, 2H), 2.91 – 2.75 (m, 1H), 2.48 (tdd, *J* = 10.1, 8.3, 1.5 Hz, 1H), 2.20 – 2.04 (m, 1H), 1.87 (d, *J* = 13.7 Hz, 1H), 1.55 – 1.42 (m, 2H), 1.36 – 1.22 (m, 6H), 0.98 – 0.78 (m, 12H), 0.05 (s, 2H), 0.02 (s, 2H). **<sup>13</sup>C NMR** (125 MHz, CDCl<sub>3</sub>) *Epimer a and b*:  $\delta_{\text{C}}$  = 171.2, 170.6, 139.9, 139.3, 124.6, 124.4, 99.5, 98.4, 80.8, 80.7, 75.7, 72.9, 72.3, 72.3, 42.6, 40.8, 38.4, 38.1, 38.1, 36.2, 35.9, 35.5, 31.9, 26.0, 25.9, 25.0, 24.9, 22.7, 22.7, 18.4, 18.3, 14.2, -4.2, -4.2, -4.7, -4.7.

**HRMS** (ESI) *m/z*: [M+Na]<sup>+</sup> Calcd. for C<sub>21</sub>H<sub>38</sub>NaO<sub>5</sub>Si 421.2380; Found 421.2370.

[ $\alpha$ ]<sub>D</sub><sup>23</sup> = -42.44 (*c* 1.00, CHCl<sub>3</sub>)

**(1*R*,4*S*,*E*)-4-((*tert*-Butyldimethylsilyl)oxy)-1-((2*S*,3*R*,5*R*)-2-(2-hydroxyethyl)-5-((4-methoxybenzyl)oxy)tetrahydrofuran-3-yl)non-2-en-1-ol (20)**

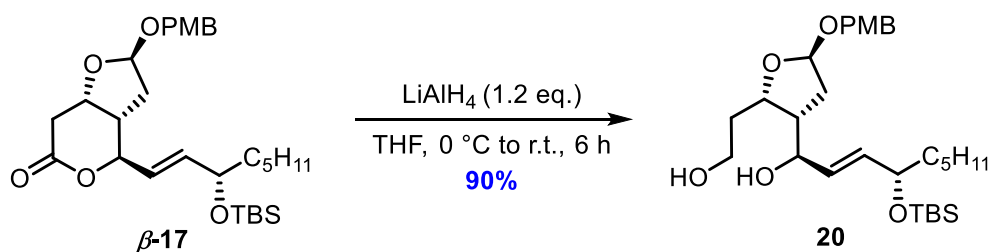

To a solution of  $\beta\text{-17}$  (51.9 mg, 0.10 mmol, 1.0 eq.) in dry THF (2.0 mL) at 0 °C under N<sub>2</sub> atmosphere, LiAlH<sub>4</sub> (1.0 M in THF, 0.12 mL, 0.12 mmol, 1.2 eq.) was added dropwisely. After stirring at this temperature for 5 min, the reaction mixture was warmed to r.t. and stirred for

another 6 h. The reaction was quenched by addition of  $\text{Na}_2\text{SO}_4 \cdot 10\text{H}_2\text{O}$  and 10% NaOH solution. The above mixture was stirred at r.t. for 10 min before  $\text{MgSO}_4$  (s) was added and stirred for a further 5 min prior to sinter filtration. After washing with EtOAc ( $3 \times 5$  mL), the filtrate was concentrated in *vacuo* and purified by flash column chromatography on silica gel (Hexanes/EtOAc = 2:1 to 1:1) to give pure **20** (47.0 mg, 0.09 mmol, 90%) as a colorless oil.

$R_f$  = 0.12 (Hexanes/EtOAc = 1:1)

**IR** (thin film)  $\nu_{\text{max}}/\text{cm}^{-1}$ : 3405, 2955, 2931, 2854, 1740, 1491, 1461, 1360, 1250, 1135, 1062, 1011, 863, 809, 776.

**$^1\text{H}$  NMR** (400 MHz,  $\text{CDCl}_3$ )  $\delta_{\text{H}}$  = 7.26 – 7.22 (m, 2H), 6.93 – 6.83 (m, 2H), 5.65 (dd,  $J$  = 15.4, 5.6 Hz, 1H), 5.57 (ddd,  $J$  = 15.4, 7.1, 0.8 Hz, 1H), 5.14 (dd,  $J$  = 5.2, 1.1 Hz, 1H), 4.63 (d,  $J$  = 11.5 Hz, 1H), 4.45 (td,  $J$  = 7.3, 3.6 Hz, 1H), 4.39 (d,  $J$  = 11.5 Hz, 1H), 4.11 – 4.02 (m, 2H), 3.92 – 3.85 (m, 2H), 3.80 (s, 3H), 2.80 (br. s, 1H), 2.65 – 2.57 (m, 1H), 2.08 – 2.01 (m, 1H), 1.87 – 1.76 (m, 2H), 1.73 – 1.66 (m, 1H), 1.56 – 1.36 (m, 3H), 1.31 – 1.23 (m, 6H), 0.89 (s, 12H), 0.04 (s, 3H), 0.02 (s, 3H).

**$^{13}\text{C}$  NMR** (125 MHz,  $\text{CDCl}_3$ )  $\delta_{\text{C}}$  = 159.3, 136.7, 130.8, 130.3, 129.6, 113.9, 101.8, 80.8, 72.8, 72.7, 68.8, 62.5, 55.4, 45.9, 38.3, 35.7, 32.6, 31.9, 26.0, 25.0, 22.7, 18.4, 14.2, -4.1, -4.6.

**HRMS** (ESI)  $m/z$ :  $[\text{M}+\text{Na}]^+$  Calcd. for  $\text{C}_{29}\text{H}_{50}\text{NaO}_6\text{Si}$  545.3269; Found 545.3271.

$[\alpha]_{\text{D}}^{22} = -32.34$  ( $c$  1.00,  $\text{CHCl}_3$ )

#### Attempt to 14 from 20

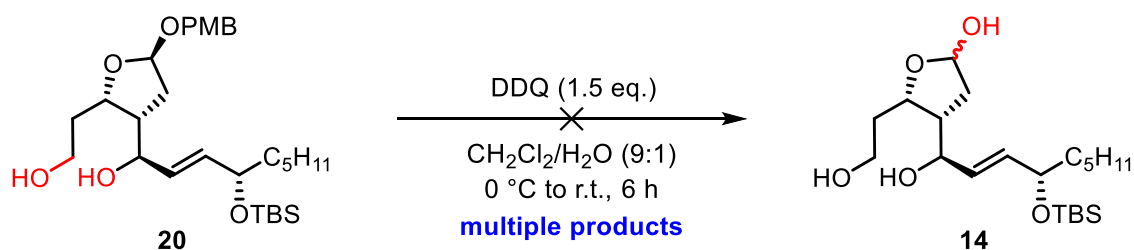

In a small round-bottom flask, a solution of **20** (8.4 mg, 16.0  $\mu\text{mol}$ , 1.0 eq.) in degassed ( $\text{N}_2$ )  $\text{CH}_2\text{Cl}_2/\text{H}_2\text{O}$  (0.64 mL, 9:1 *v/v*) was cooled to 0  $^\circ\text{C}$ . Then, fresh recrystallized DDQ (4.7 mg, 20.8  $\mu\text{mol}$ , 1.3 eq.) was added in one portion at 0  $^\circ\text{C}$  under  $\text{N}_2$  atmosphere. After the reaction mixture was stirred for 3 h at r.t., DDQ (0.7 mg, 3.2  $\mu\text{mol}$ , 0.2 eq.) was added and the mixture was stirred for another 3 h at r.t.. *Upon completion, the reaction was monitored by TLC, and the result showed that deprotection of the PMB group of 20 was not clean.* The mixture was poured over saturated  $\text{NaHCO}_3$  solution (1 mL) and extracted with  $\text{CH}_2\text{Cl}_2$  ( $3 \times 2$  mL). The organic phases were combined, washed with brine, dried over  $\text{MgSO}_4$ , filtered and

concentrated *in vacuo*. Then the reaction mixture was monitored by crude  $^1\text{H}$  NMR, and the result showed that deprotection of the PMB group of **20** gave multiple products.

## Notes and References

1. Pangborn, A. B.; Giardello, M. A.; Grubbs, R. H.; Rosen, R. K.; Timmers, F. J. Safe and Convenient Procedure for Solvent Purification. *Organometallics* **1996**, *15*, 1518-1520.
2. Burchat, A. F.; Chong, J. M.; Nielsen, N. Titration of Alkylolithiums with A Simple Reagent to A Blue Endpoint. *J. Organomet. Chem.* **1997**, *542*, 281-283.
3. (a) Matsumori, N.; Umegawa, Y.; Oishi, T.; Murata, M. Bioactive Fluorinated Derivative of Amphotericin B. *Bioorg. Med. Chem. Lett.* **2005**, *5*, 3565-3567. (b) Suzuki, K.; Ohtake, A.; Ito, Y.; Kanie, O. Synthesis of A Fluorescently Tagged Sialic Acid Analogue Useful for Live-cell Imaging. *Chem. Commun.* **2012**, *48*, 9744-9746. (c) Suzuki, K.; Daikoku, S.; Son, S.-H.; Ito, Y.; Kanie, O. Synthetic Study of 3-Fluorinated Sialic Acid Derivatives. *Carbohydr. Res.* **2015**, *406*, 1-9.
4. Pelss, A.; Gandhamsetty, N.; Smith, J. R.; Mailhol, D.; Silvi, M.; Watson, A. J. A.; Perez-Powell, I.; Prévost, S.; Schützenmeister, N.; Moore, P. R.; Aggarwal, V. K. Re-optimization of the Organocatalyzed Double Aldol Domino Process to a Key Enal Intermediate and its Application to the Total Synthesis of  $\Delta^{12}$ -Prostaglandin J<sub>3</sub>. *Chem. Eur. J.* **2018**, *24*, 9542-9545.
5. Yadav, J. S.; Deshpande, P. K.; Sharma, G. V. M. Stereoselective Synthesis of (*S*)-13-Hydroxy Octadeca-(9*Z*,11*E*)-di- and (9*Z*,11*E*,15*Z*)-trienoic Acids: Selfdefensive Substances Against Rice Blast Disease. *Tetrahedron* **1992**, *48*, 4465-4474.
6. Noyori, R.; Tomino, I.; Yamada, M.; Nishizawa, M. Synthetic Applications of the Enantioselective Reduction by Binaphthol-Modified Lithium Aluminum Hydride Reagents. *J. Am. Chem. Soc.* **1984**, *106*, 6717-6725.
7. Nicolaou, K. C.; Veale, C. A.; Webber, S. E.; Katerinopoulos, H. Stereocontrolled Total Synthesis of Lipoxins A. *J. Am. Chem. Soc.* **1985**, *107*, 7515-7518.

## NMR Spectra for the Products

(2*R*,3*aR*,6*aS*)-2-((4-Methoxybenzyl)oxy)-3,3*a*,6,6*a*-tetrahydro-2*H*-cyclopenta[*b*]furan-5-carbaldehyde (***β***-15)

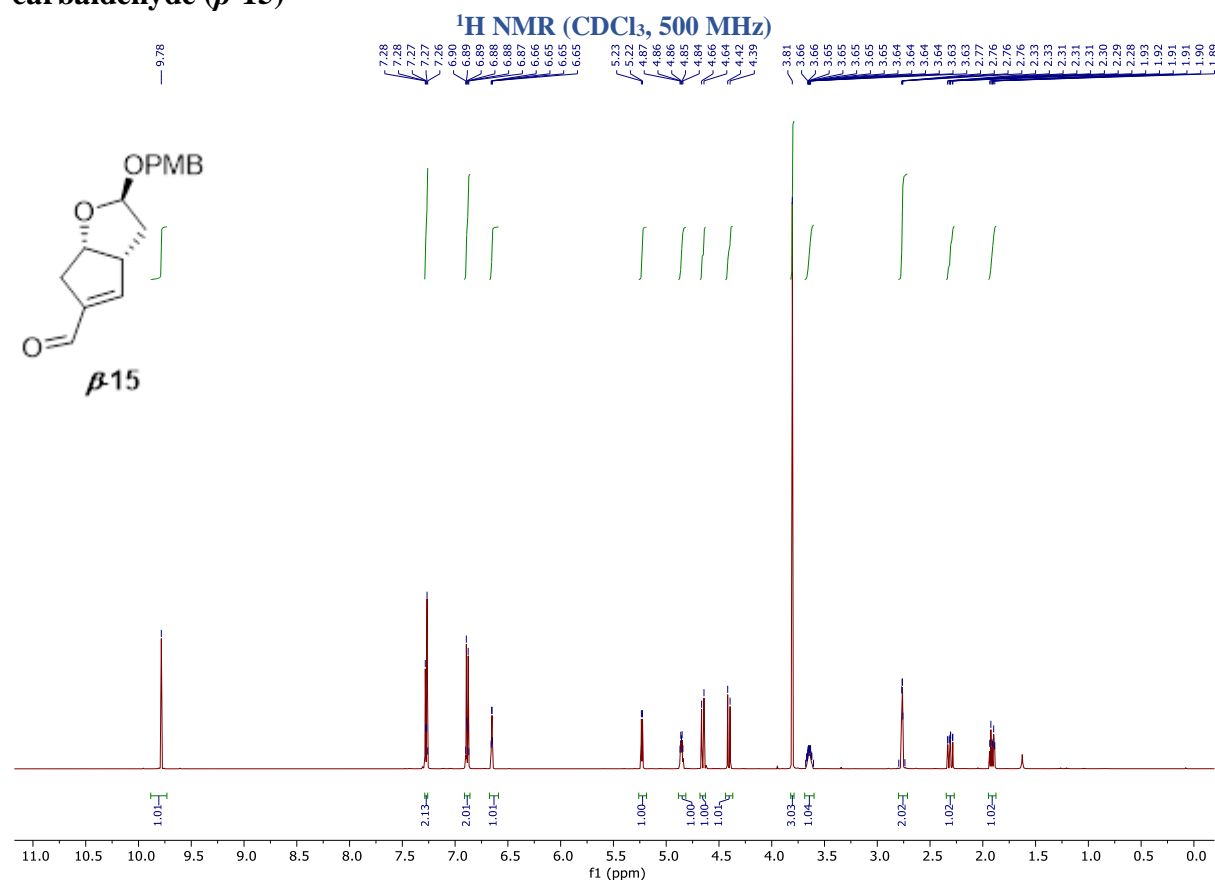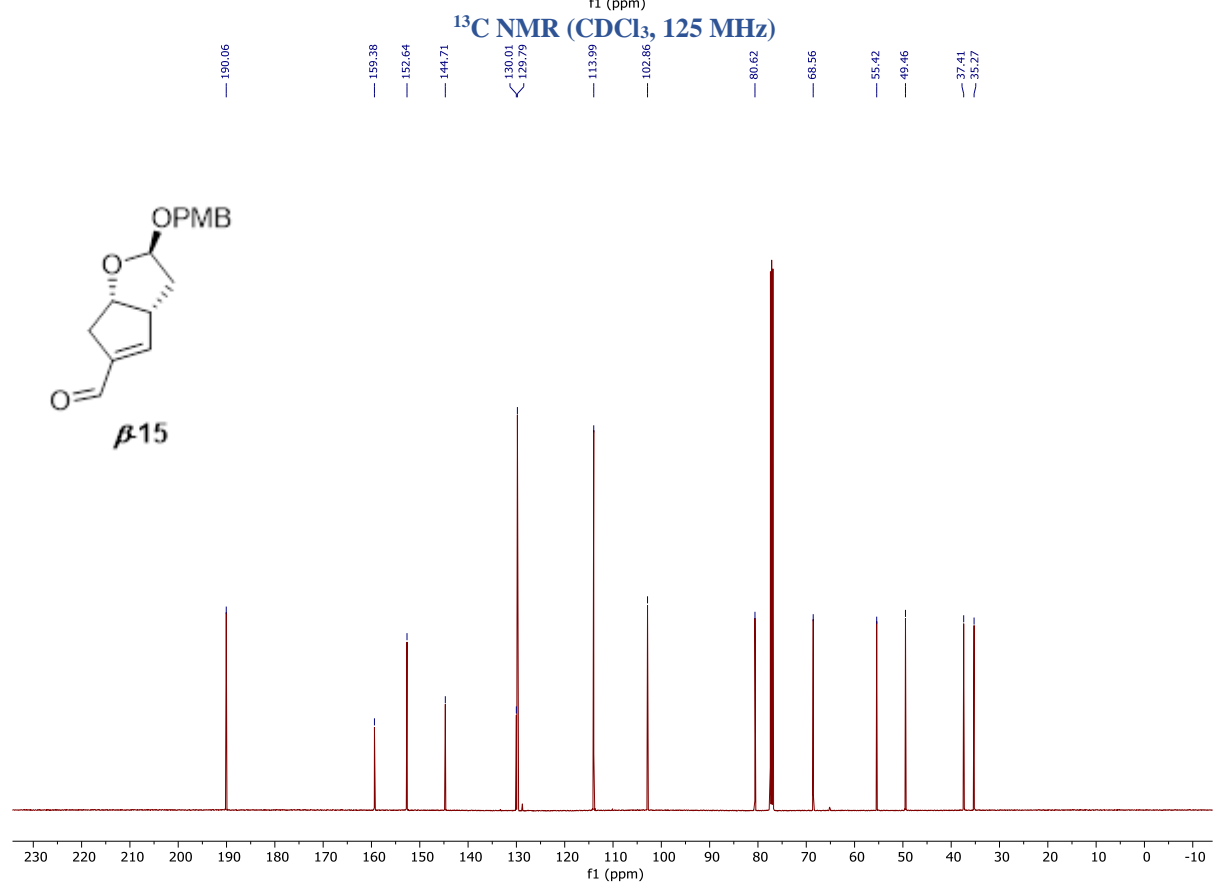

**(2*S*,3*aR*,6*aS*)-2-((4-methoxybenzyl)oxy)-3,3*a*,6,6*a*-tetrahydro-2*H*-cyclopenta[*b*]furan-5-carbaldehyde ( $\alpha$ -15)**

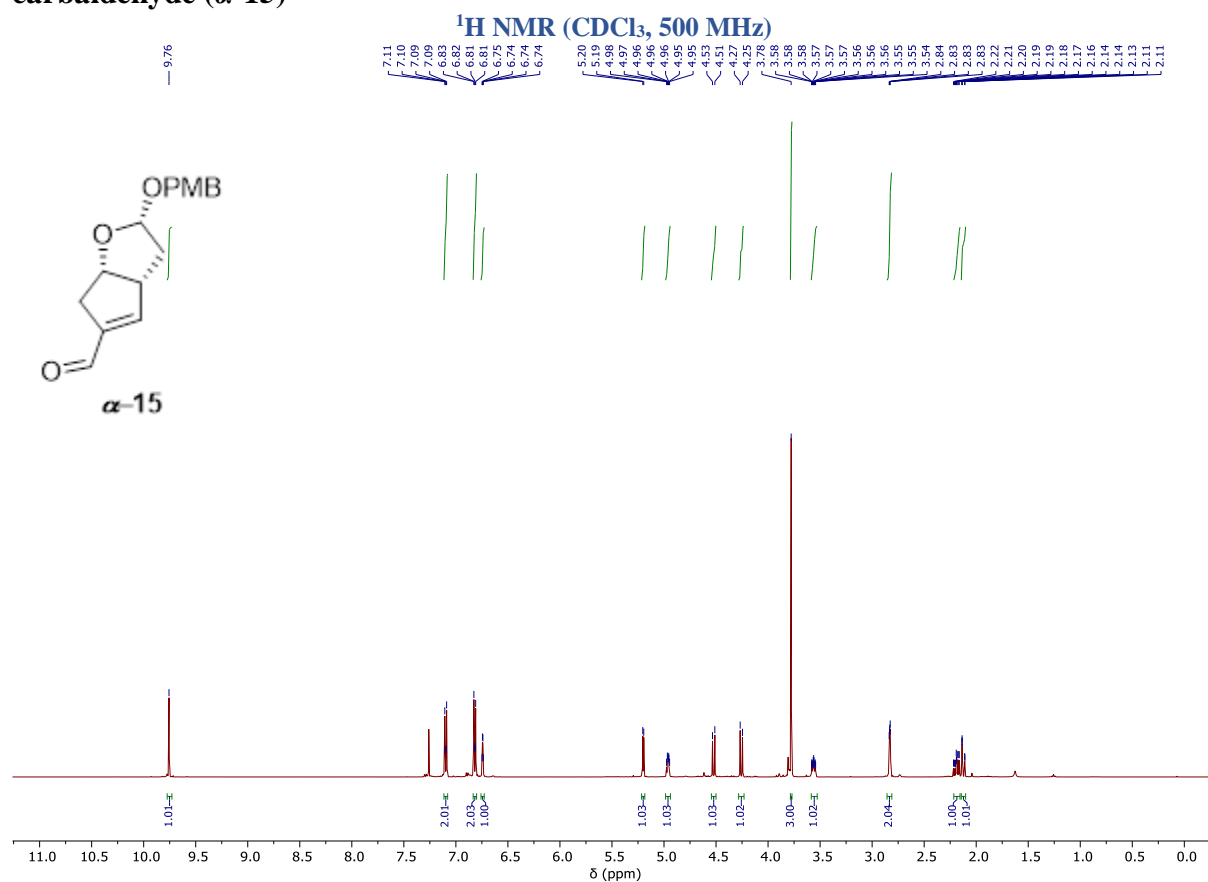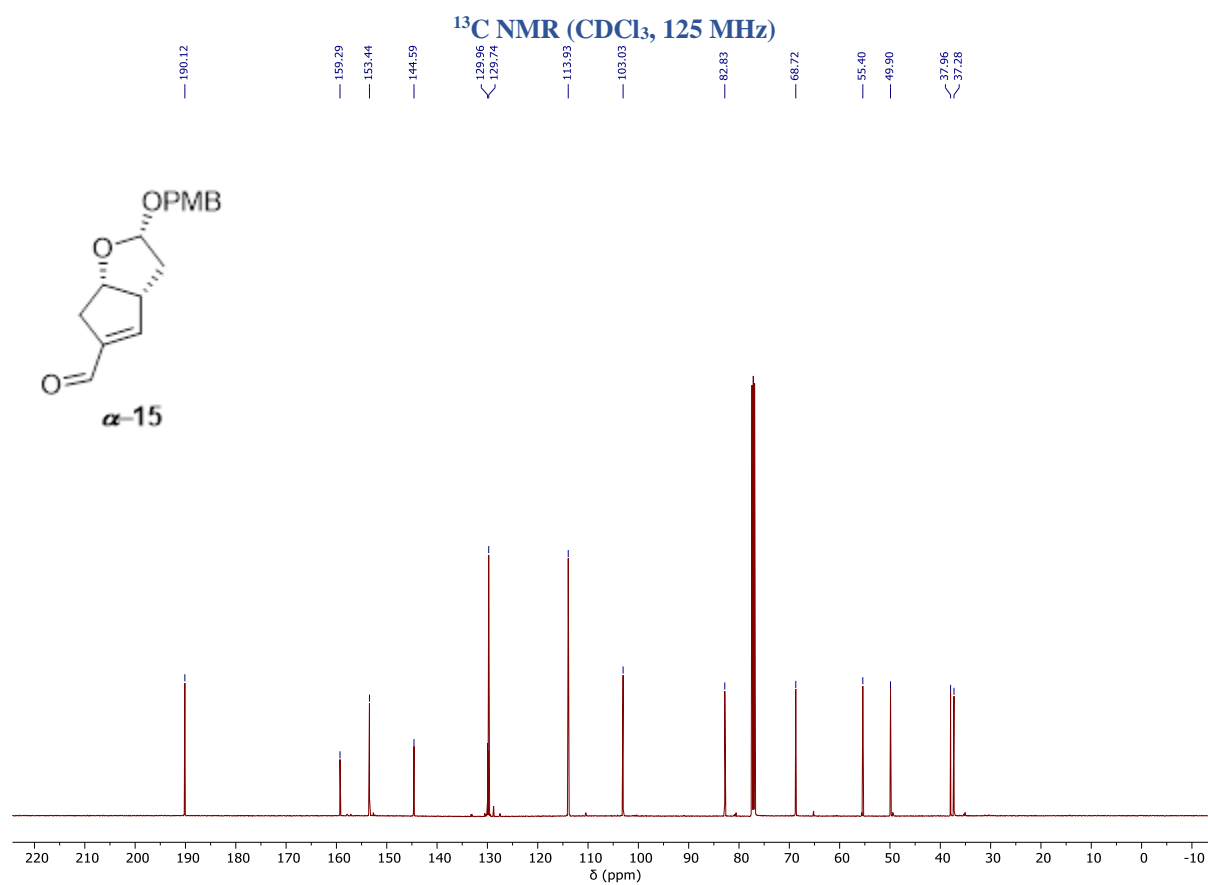



**(2*R*,3*aS*,4*R*,7*aS*)-4-((*S,E*)-3-((*tert*-Butyldimethylsilyl)oxy)oct-1-en-1-yl)-2-((4-methoxybenzyl)oxy)hexahydro-6*H*-furo[3,2-*c*]pyran-6-one ( $\beta$ -17)**

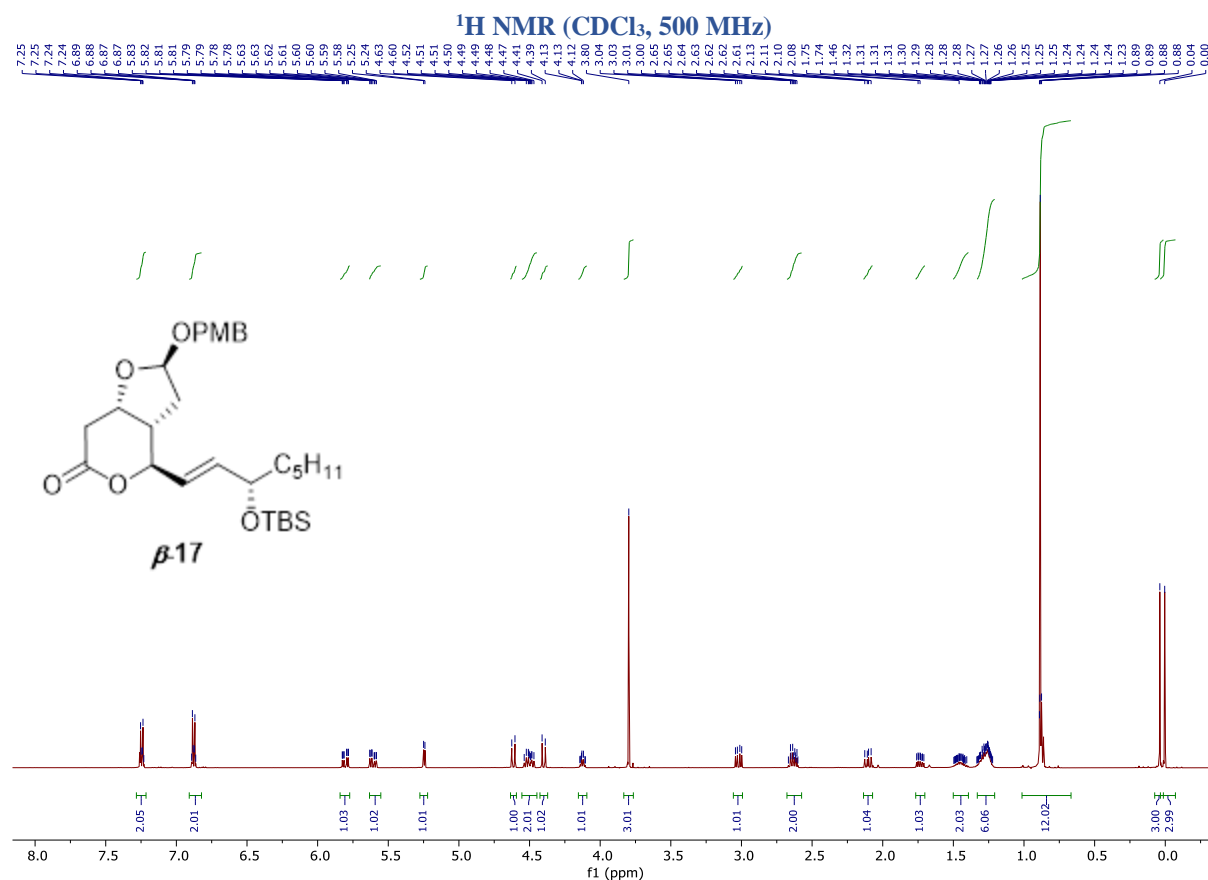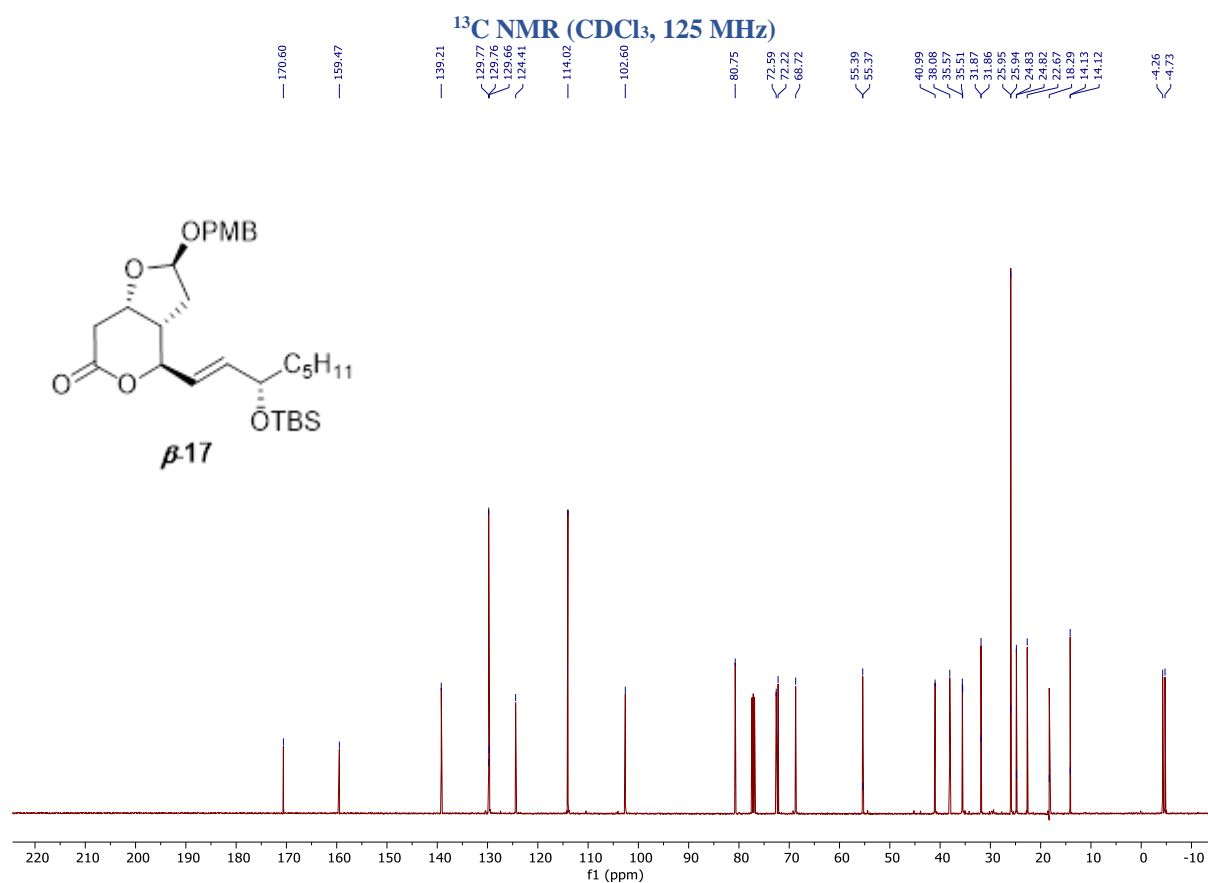

**(2*R*,3*aS*,4*R*,7*aS*)-4-((*S,E*)-3-((*tert*-Butyldimethylsilyl)oxy)oct-1-en-1-yl)-2-((4-methoxybenzyl)oxy)hexahydro-4*H*-furo[3,2-*c*]pyran-6-ol ( $\beta$ -21)**

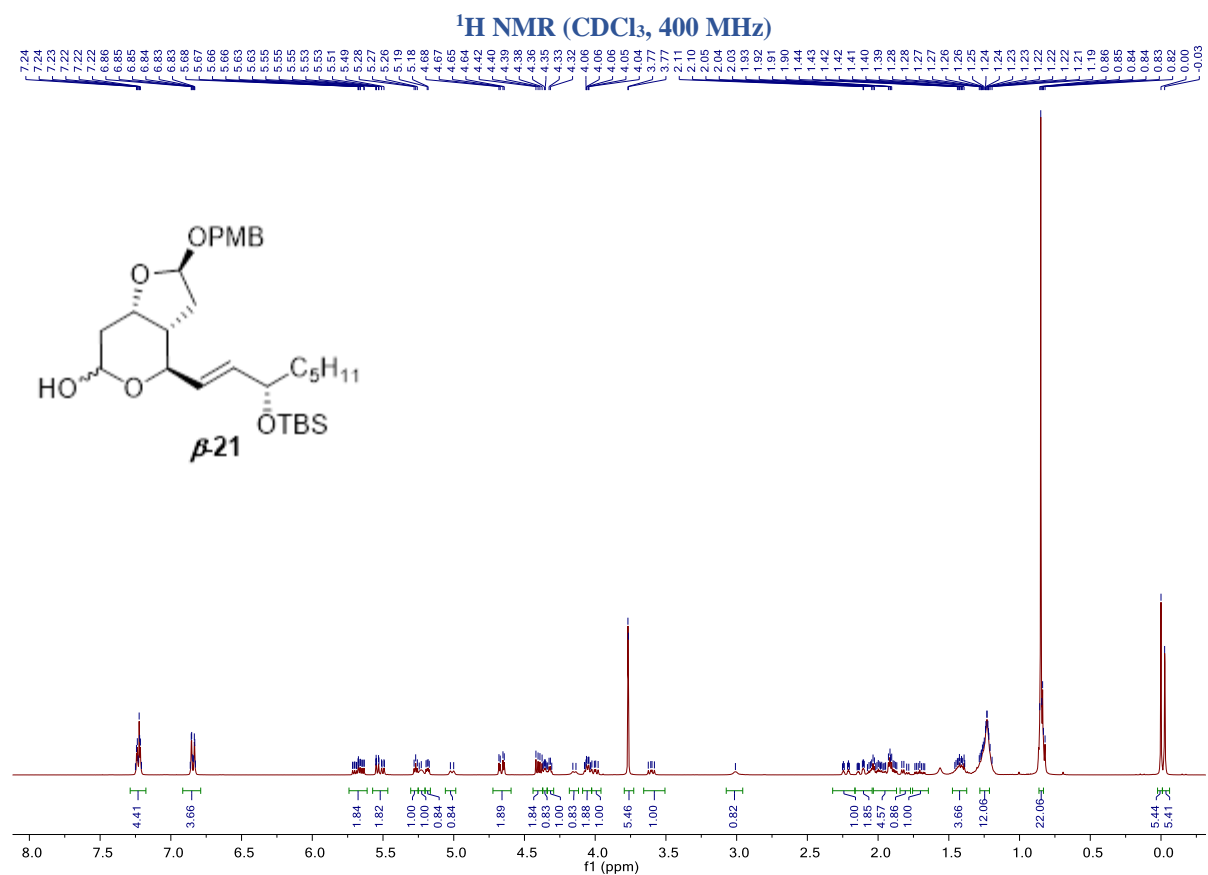

***tert*-Butyl(((*S,E*)-1-((2*R*,3*aS*,4*R*,6*R*,7*aS*)-6-methoxy-2-((4-methoxybenzyl)oxy)hexahydro-4*H*-furo[3,2-*c*]pyran-4-yl)oct-1-en-3-yl)oxy)dimethylsilane (***β***-22)**

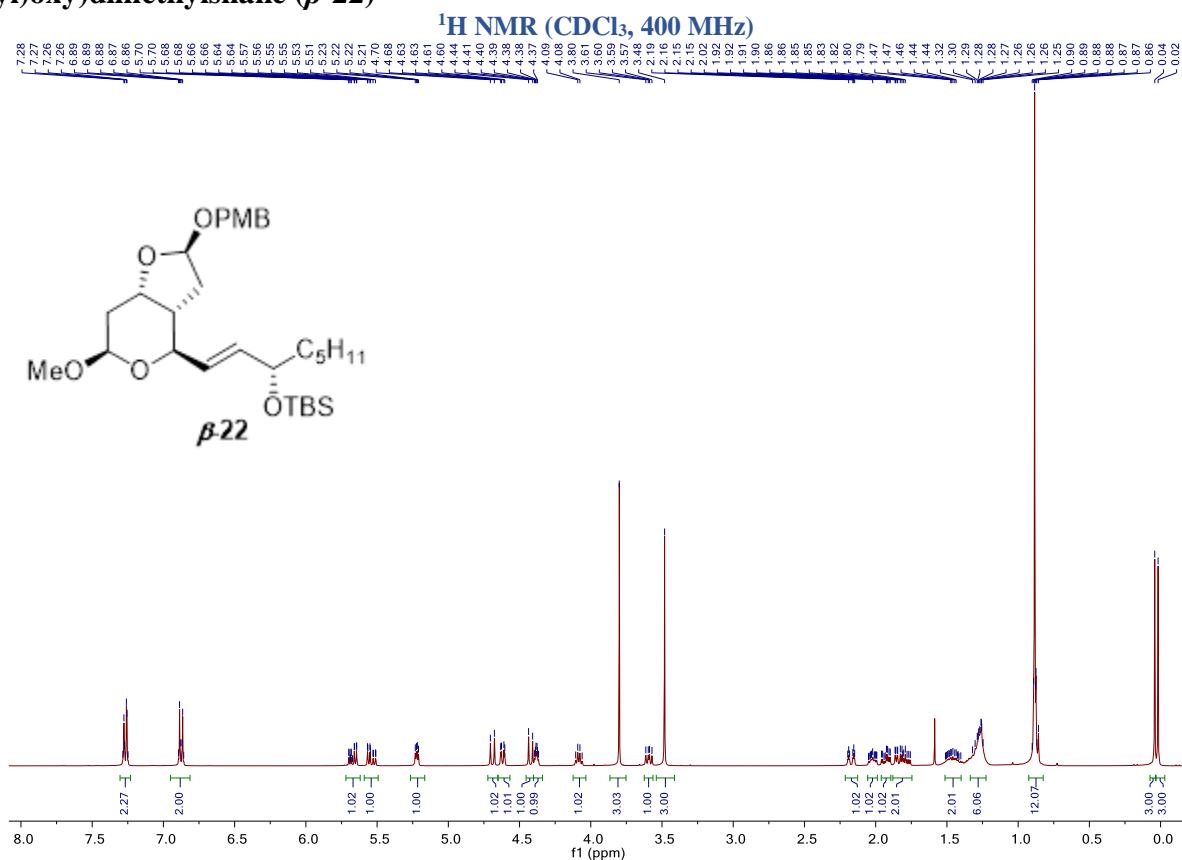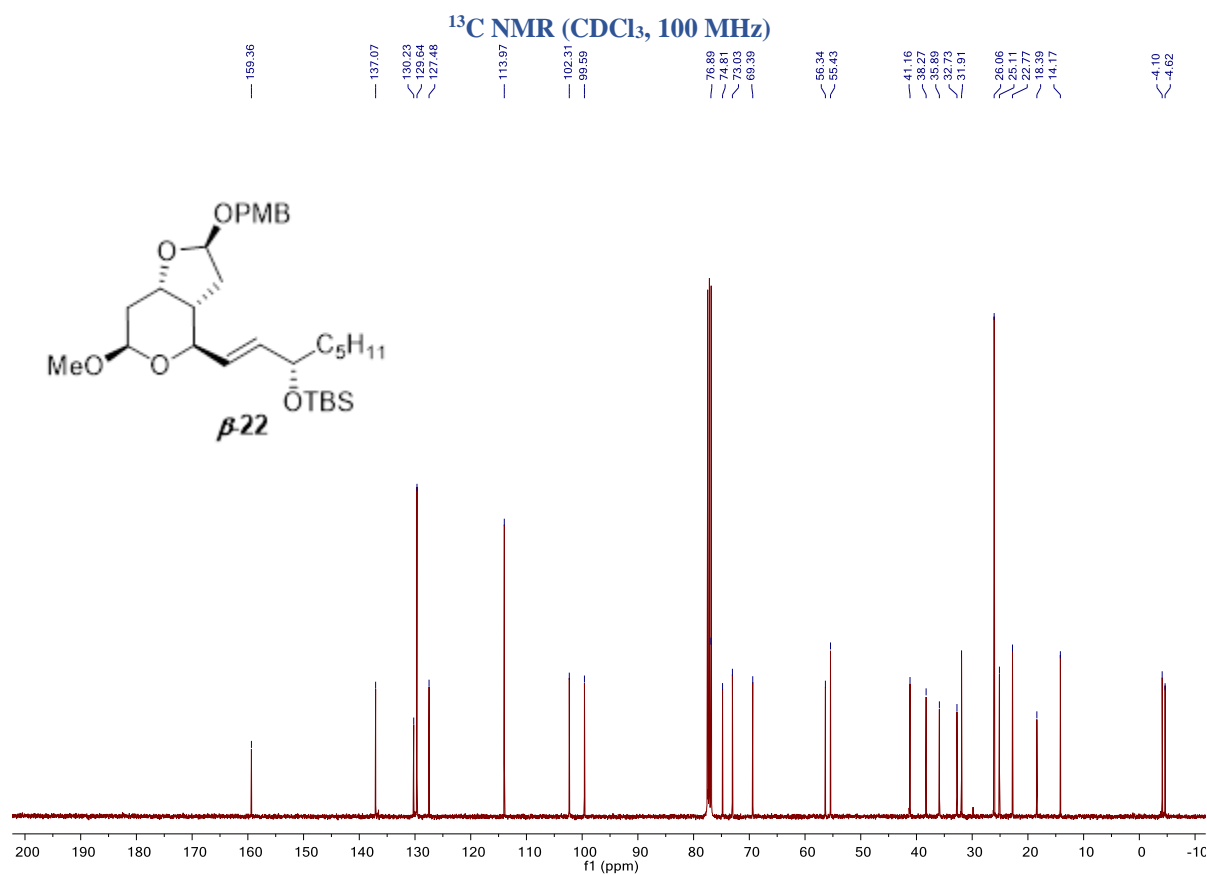

**(3a*S*,4*R*,6*R*,7a*S*)-4-((*S,E*)-3-((*tert*-Butyldimethylsilyl)oxy)oct-1-en-1-yl)-6-methoxyhexahydro-4*H*-furo[3,2-*c*]pyran-2-ol (23, from  $\beta$ -22)**

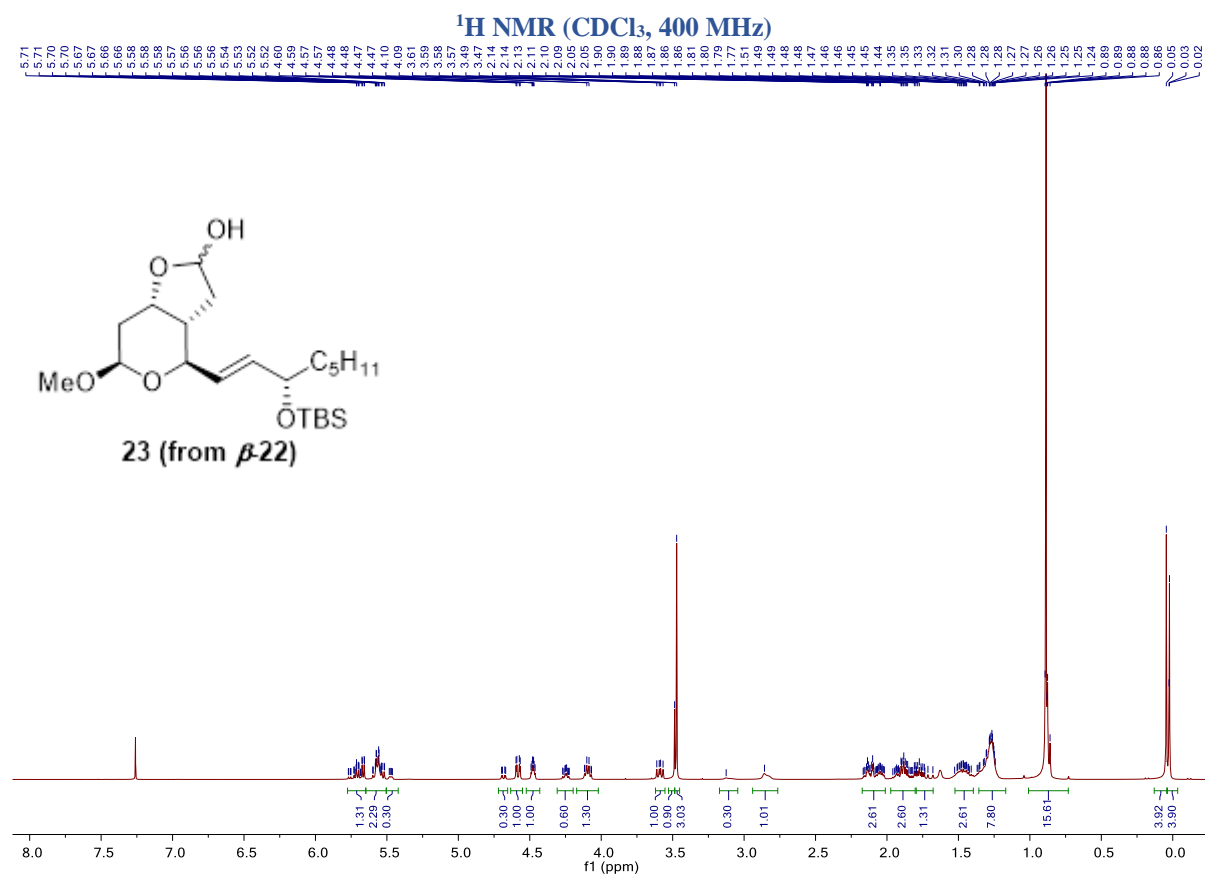

**(2*S*,3*aS*,4*R*,7*aS*)-4-((*S,E*)-3-((*tert*-Butyldimethylsilyl)oxy)oct-1-en-1-yl)-2-((4-methoxybenzyl)oxy)hexahydro-6*H*-furo[3,2-*c*]pyran-6-one (*α*-17)**

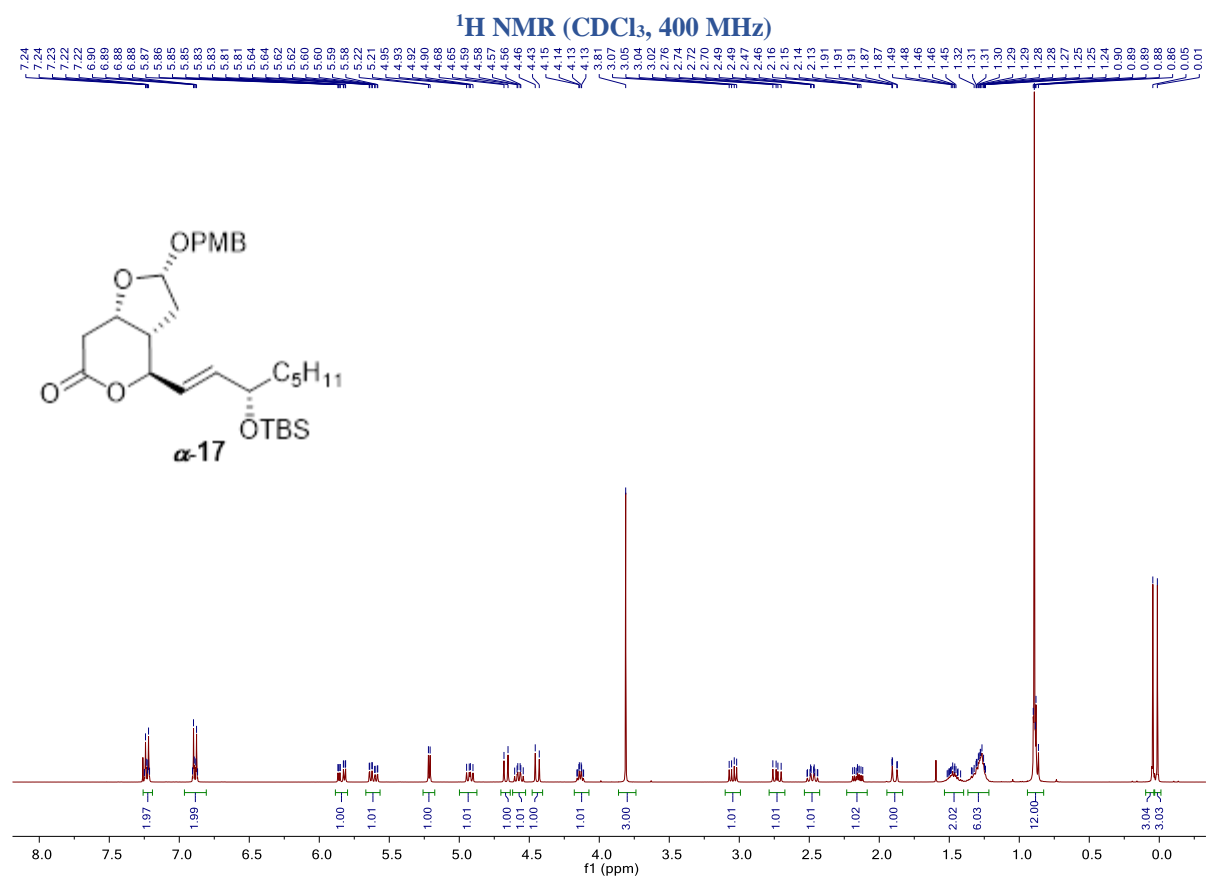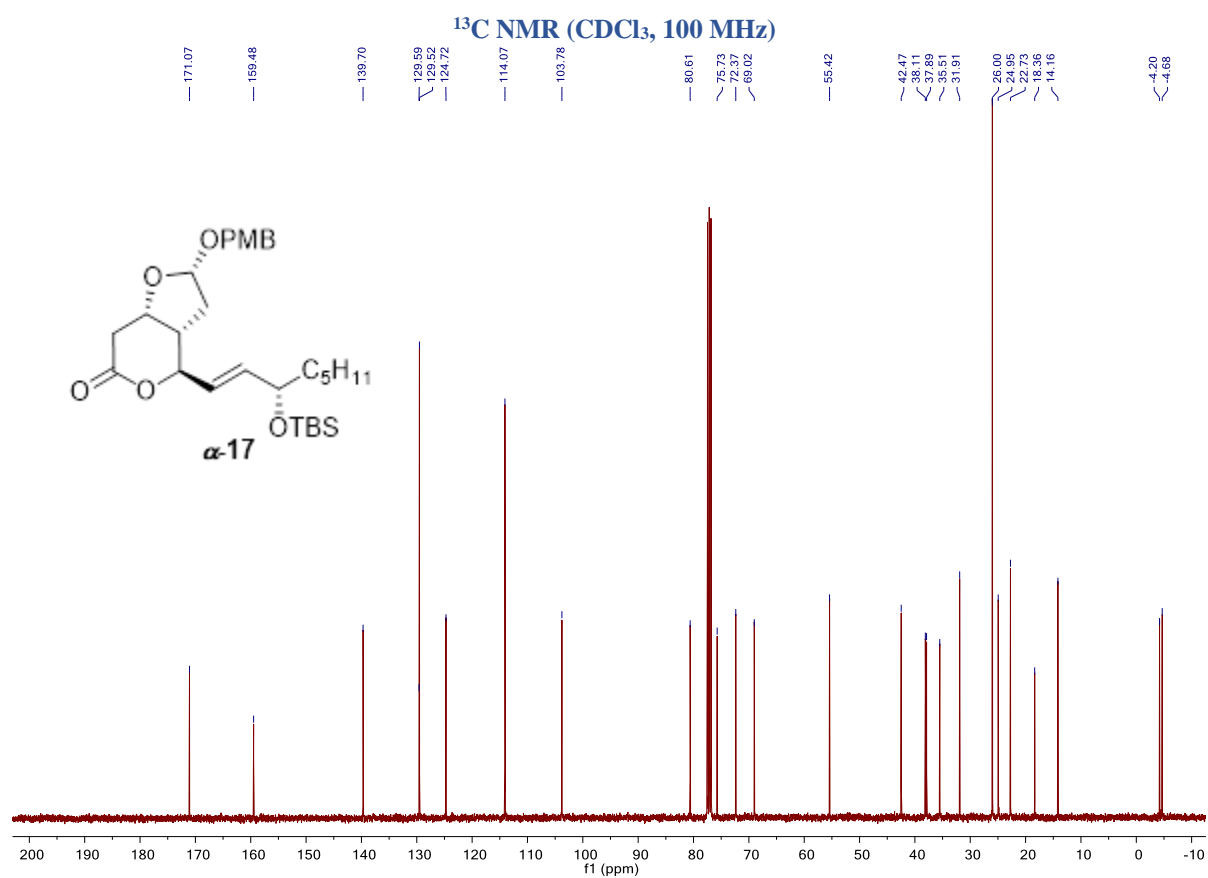

[illegible]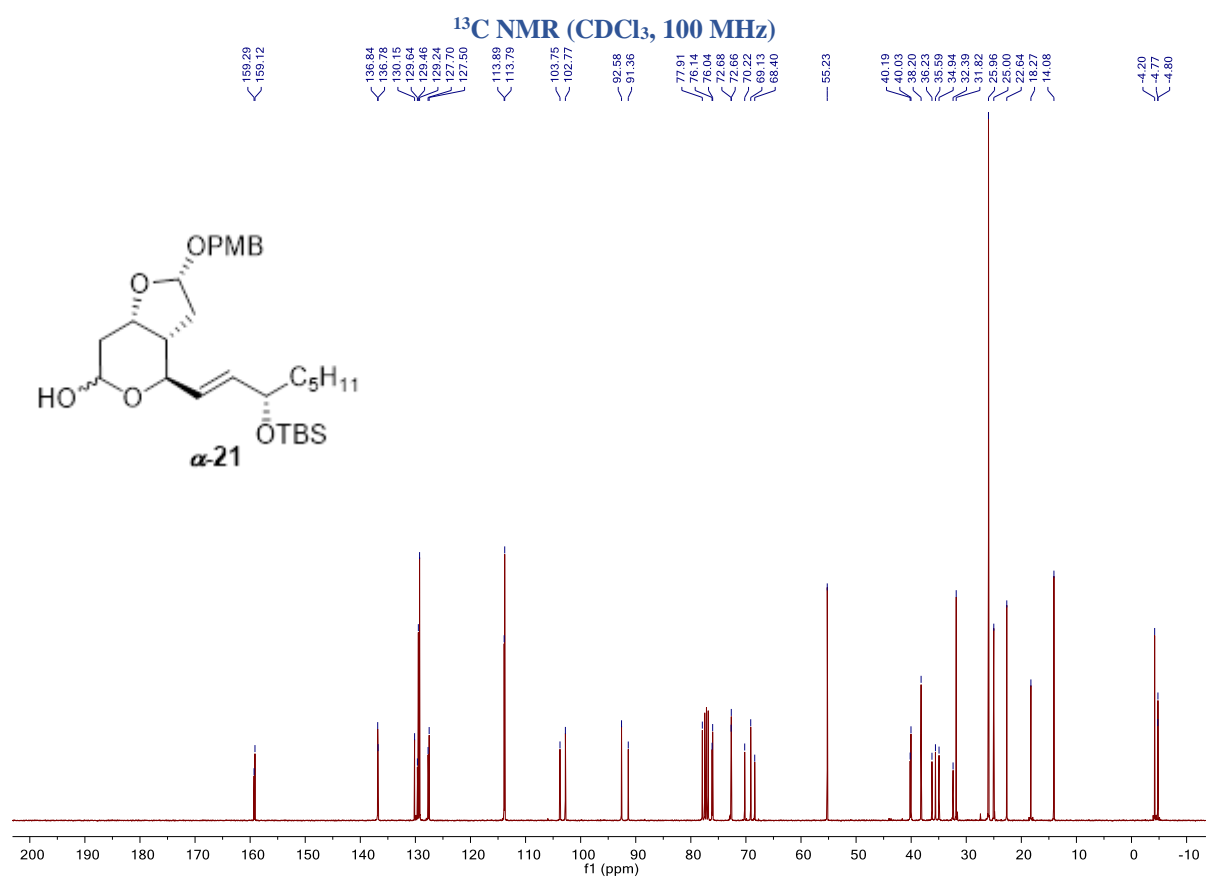

***tert*-Butyl(((*S,E*)-1-((2*S*,3*aS*,4*R*,6*R*,7*aS*)-6-methoxy-2-((4-methoxybenzyl)oxy)hexahydro-4*H*-furo[3,2-*c*]pyran-4-yl)oct-1-en-3-yl)oxy)dimethylsilane ( $\alpha$ -22)**

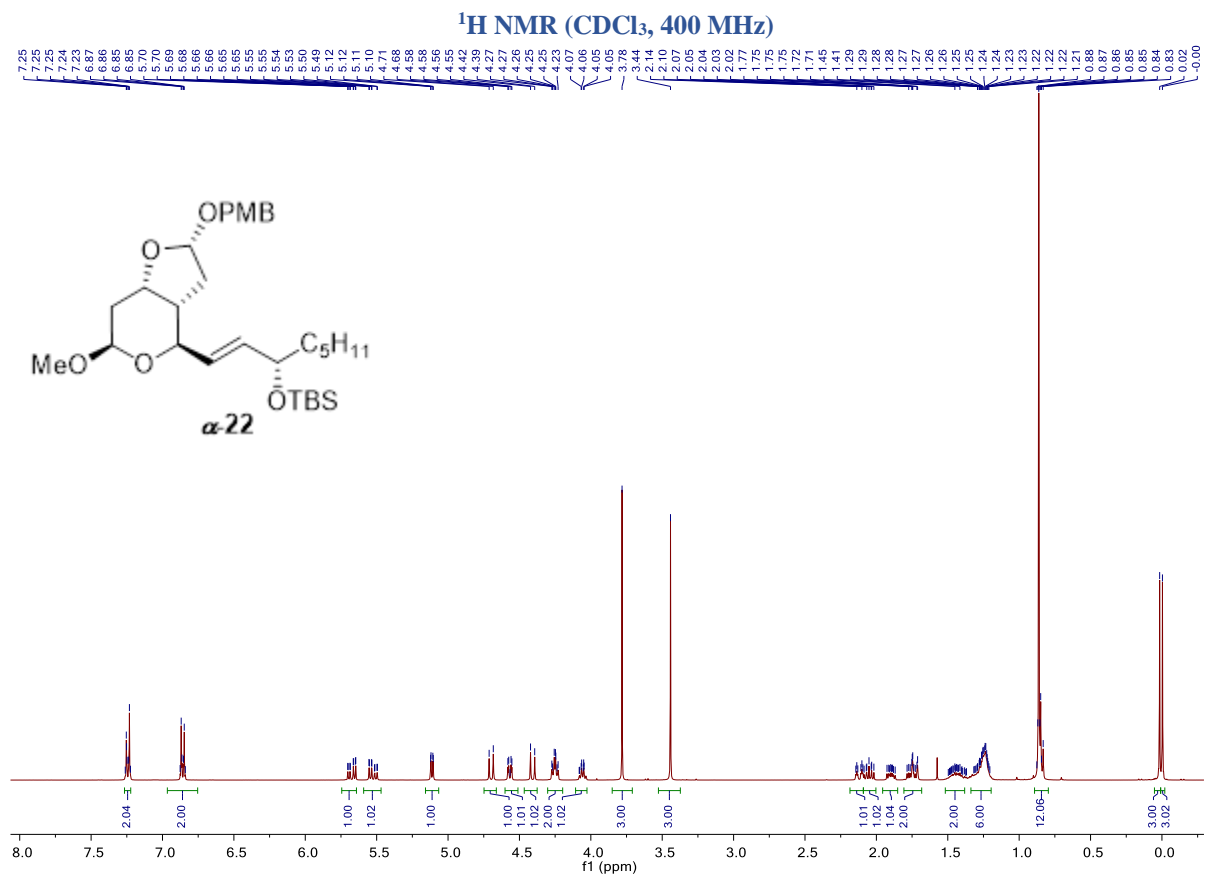

**(3a*S*,4*R*,6*R*,7a*S*)-4-((*S,E*)-3-((*tert*-Butyldimethylsilyl)oxy)oct-1-en-1-yl)-6-methoxyhexahydro-4*H*-furo[3,2-*c*]pyran-2-ol (23, from  $\alpha$ -22)**

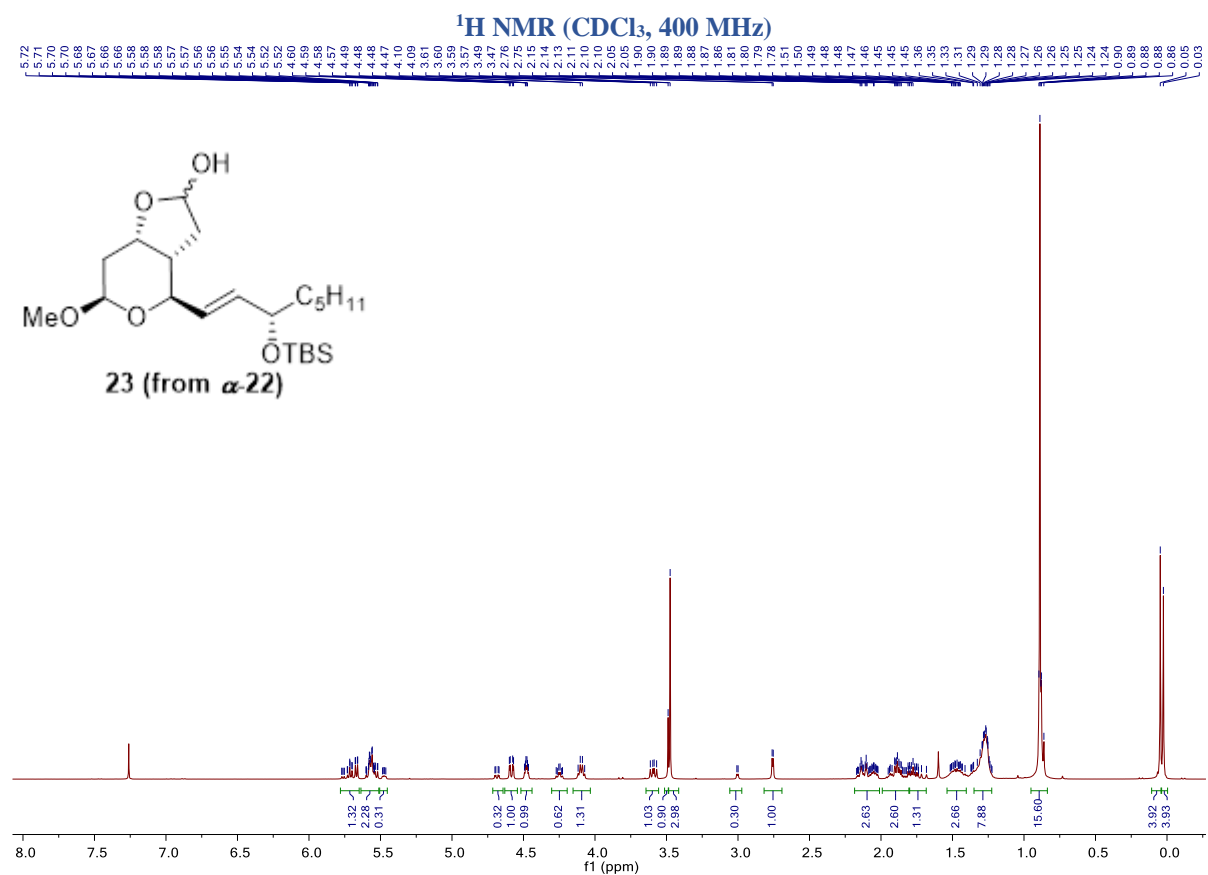



**(Z)-7-((2R,3S,4S,6R)-2-((S,E)-3-((tert-Butyldimethylsilyl)oxy)oct-1-en-1-yl)-4-hydroxy-6-methoxytetrahydro-2H-pyran-3-yl)hept-5-enoic acid (25)**

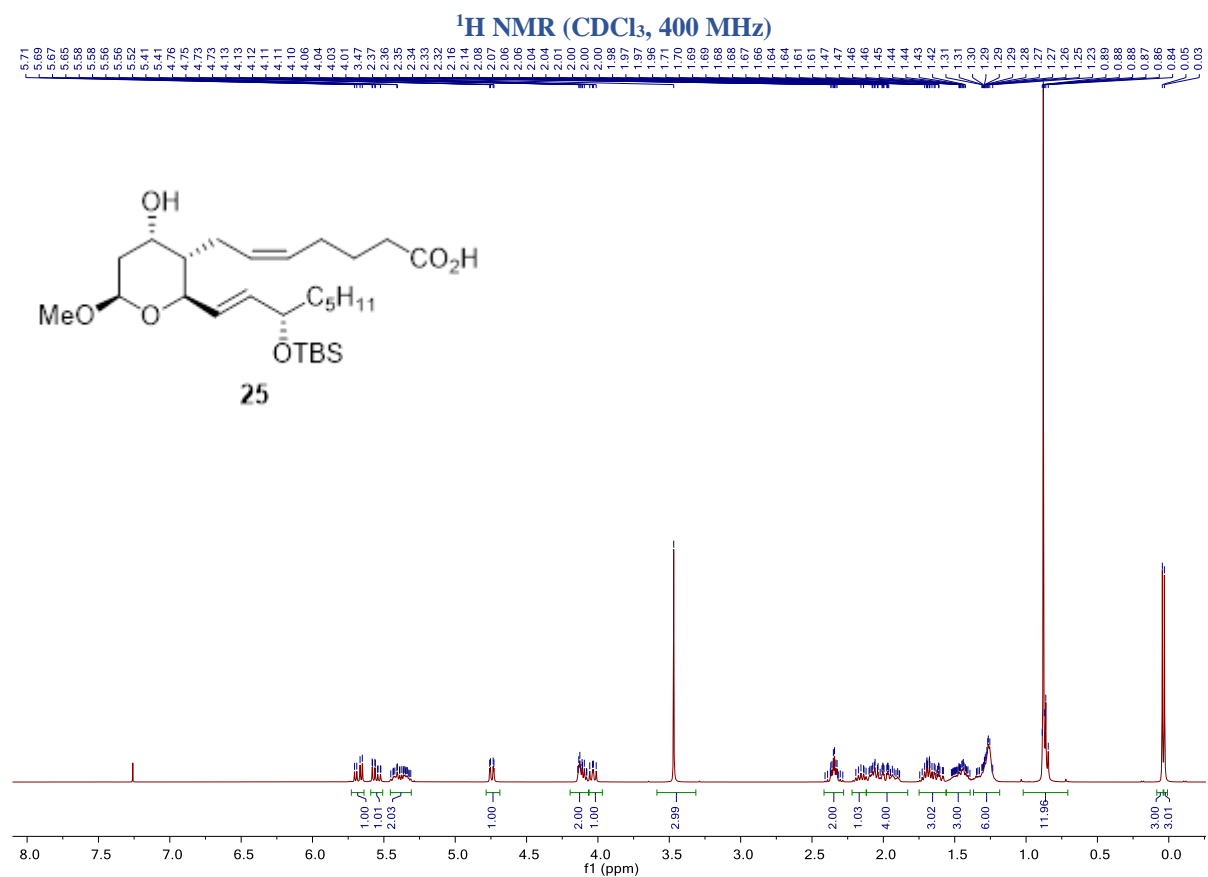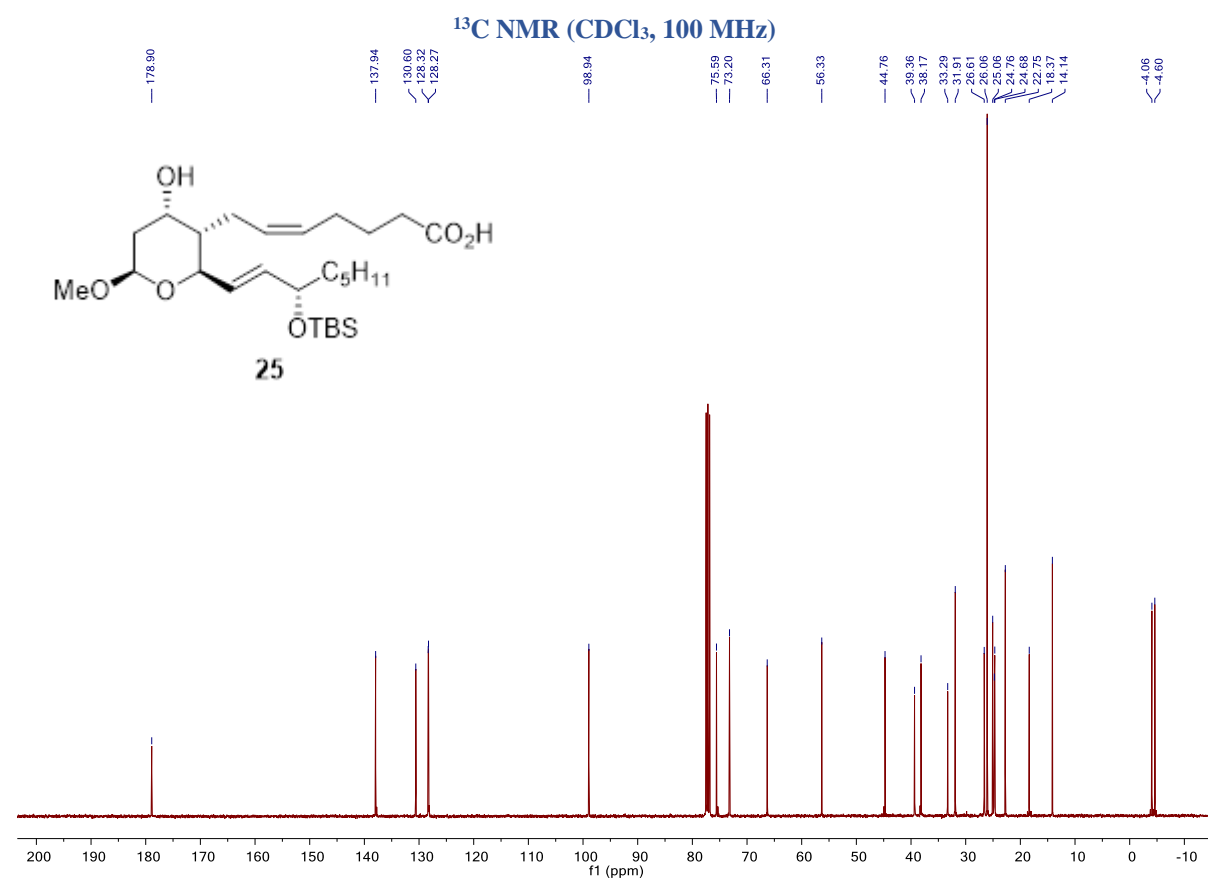

**<sup>1</sup>H NMR (CDCl<sub>3</sub>, 400 MHz)**

**26**

COC1C(O)C(C/C=C/C(O)CCCCC)OC1O

Chemical structure of compound **26** is shown. The structure is a substituted tetrahydropyran with a methoxy group (MeO), a hydroxyl group (OH), and a side chain containing a double bond, a hydroxyl group, and a pentyl group (C<sub>5</sub>H<sub>11</sub>).

The <sup>1</sup>H NMR spectrum (CDCl<sub>3</sub>, 400 MHz) displays chemical shifts from 0.82 to 5.82 ppm. Key peaks are observed at approximately 7.2 ppm (broad singlet, OH), 5.5 ppm (multiplet, C=C-H), 4.8 ppm (multiplet, C=C-H), 4.2 ppm (multiplet, C=C-H), 3.8 ppm (multiplet, C=C-H), 3.5 ppm (singlet, MeO), 2.2 ppm (multiplet, C=C-H), 1.8 ppm (multiplet, C=C-H), 1.4 ppm (multiplet, C=C-H), 1.2 ppm (multiplet, C=C-H), and 0.9 ppm (triplet, C<sub>5</sub>H<sub>11</sub>-CH<sub>3</sub>).

Integration values are provided for several peaks: 1.00, 1.00, 2.00, 1.00, 2.00, 2.02, 1.01, 3.00, 2.00, 2.03, 3.00, 3.01, 2.00, 5.02, and 3.04.

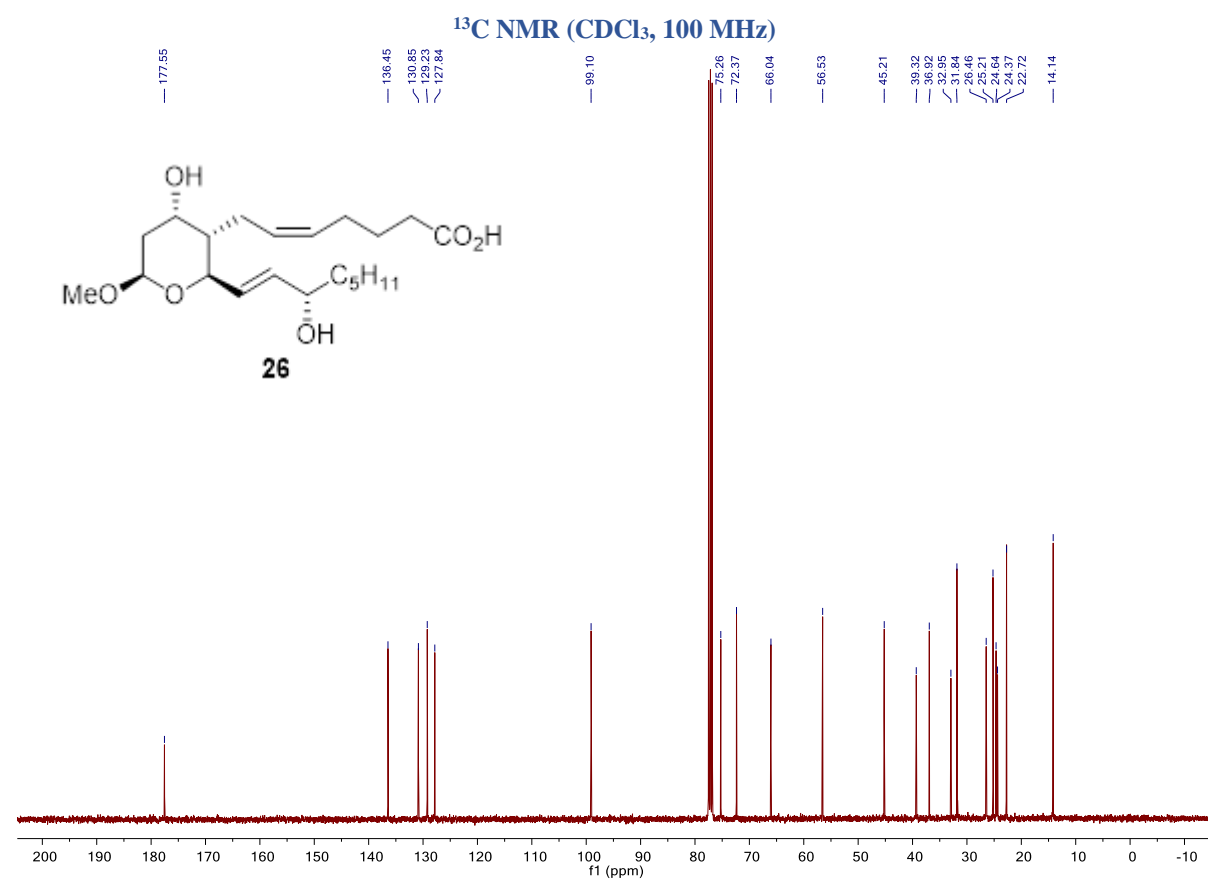

**COSY Spectrum (CDCl<sub>3</sub>, 400 MHz/400 MHz) of 26**

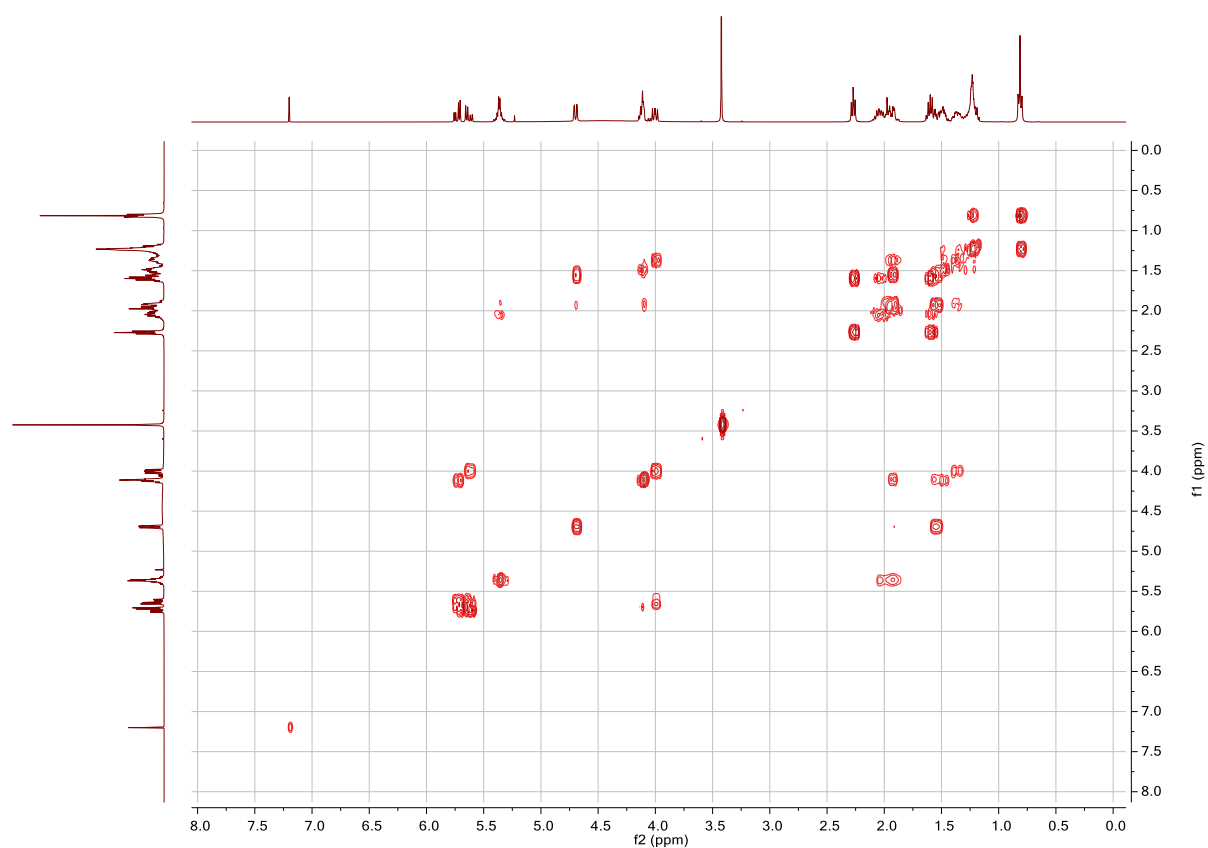

**HSQC Spectrum (CDCl<sub>3</sub>, 400 MHz/100 MHz) of 26**

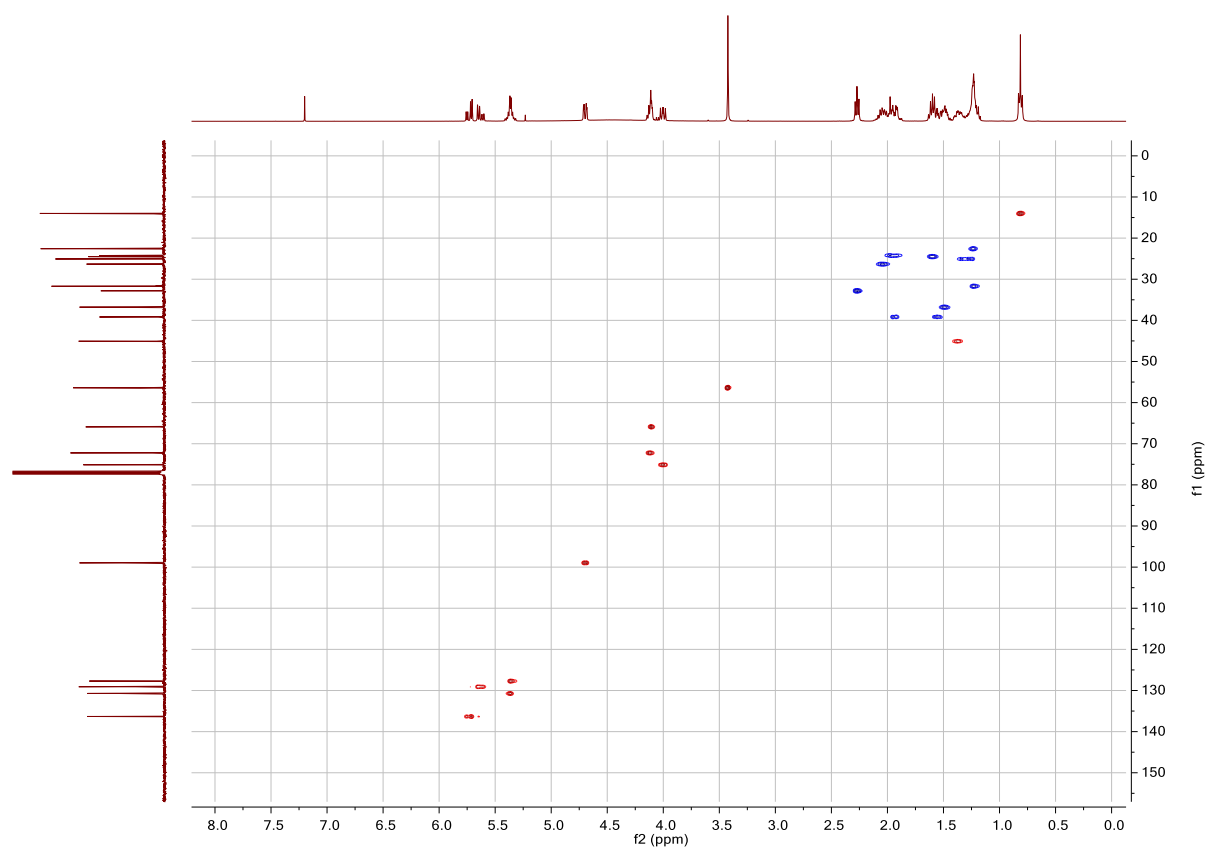

# HMBC Spectrum (CDCl<sub>3</sub>, 400 MHz/100 MHz) of 26

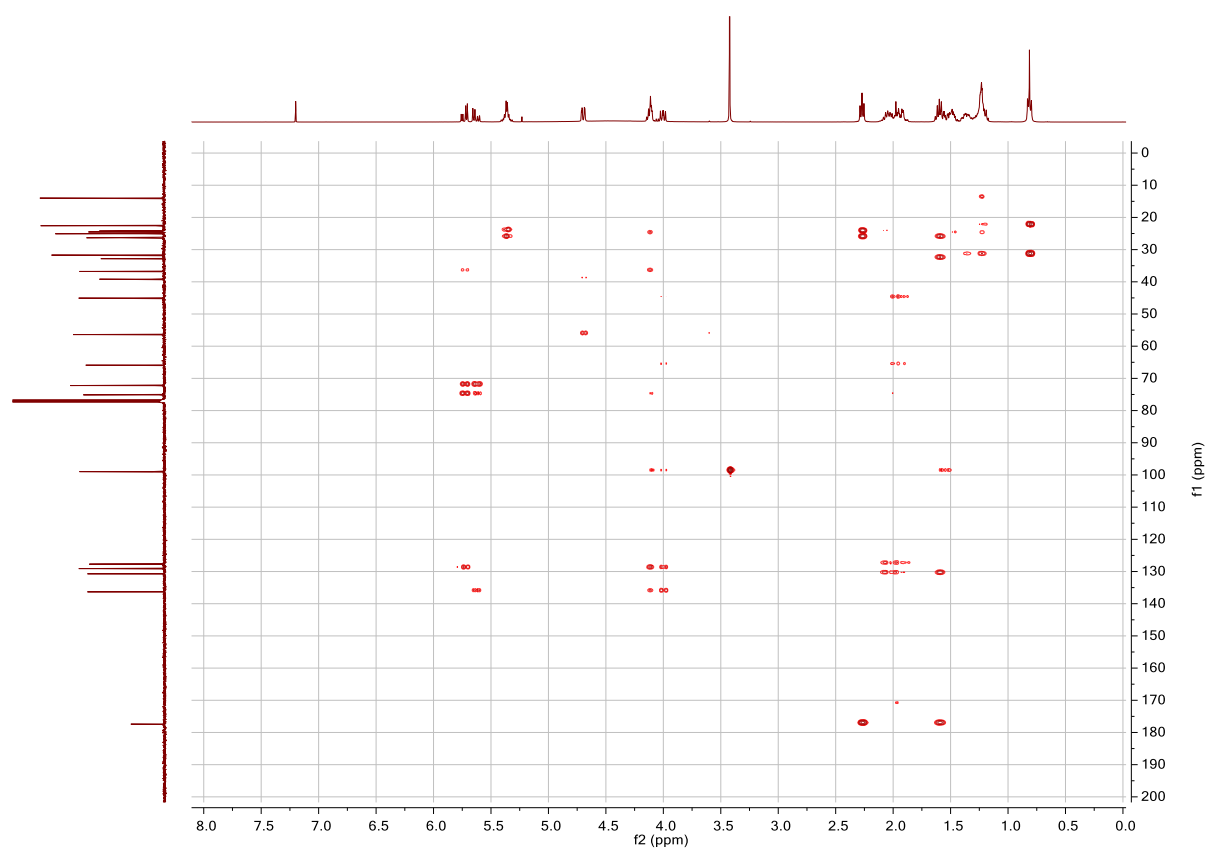

**(3a*S*,4*R*,7a*S*)-4-((*S,E*)-3-((*tert*-Butyldimethylsilyl)oxy)oct-1-en-1-yl)tetrahydro-4*H*-furo[3,2-*c*]pyran-2,6-dione (12)**

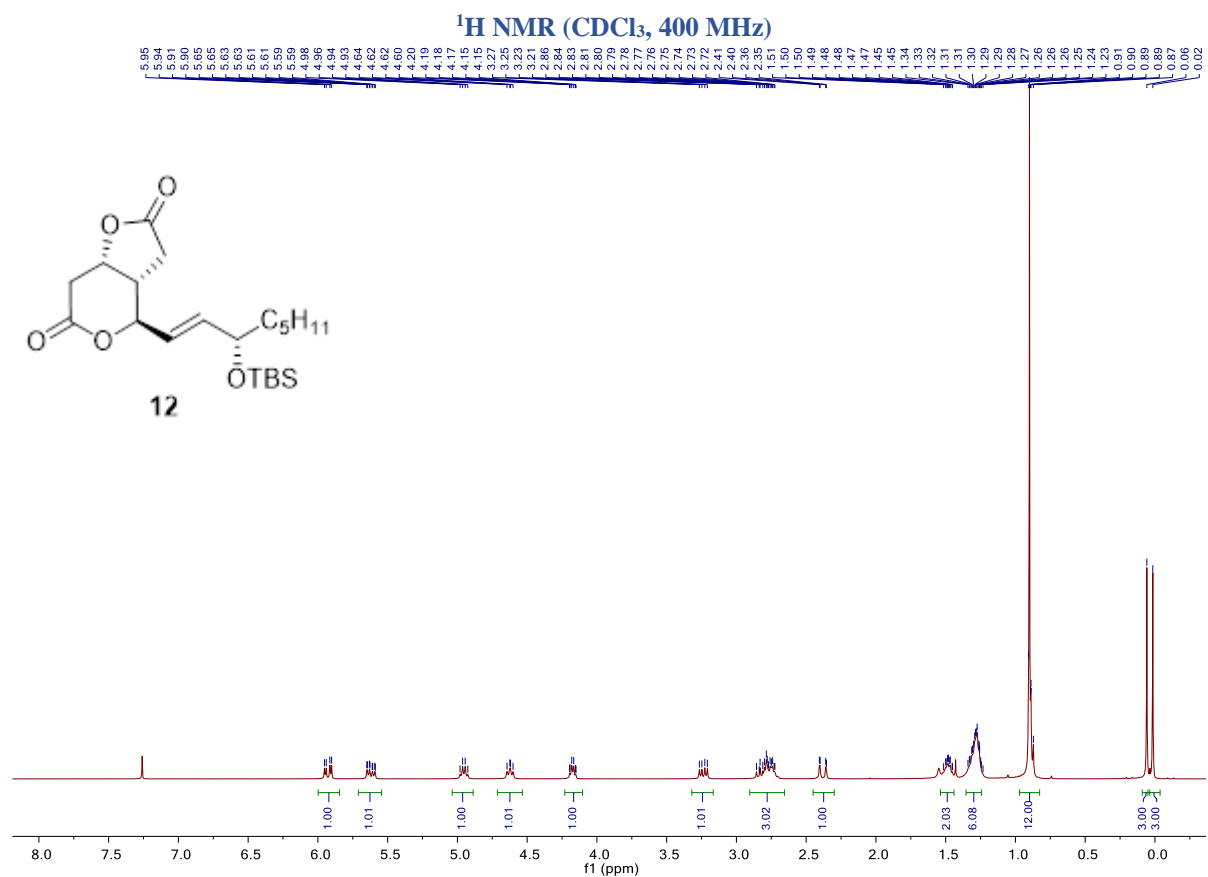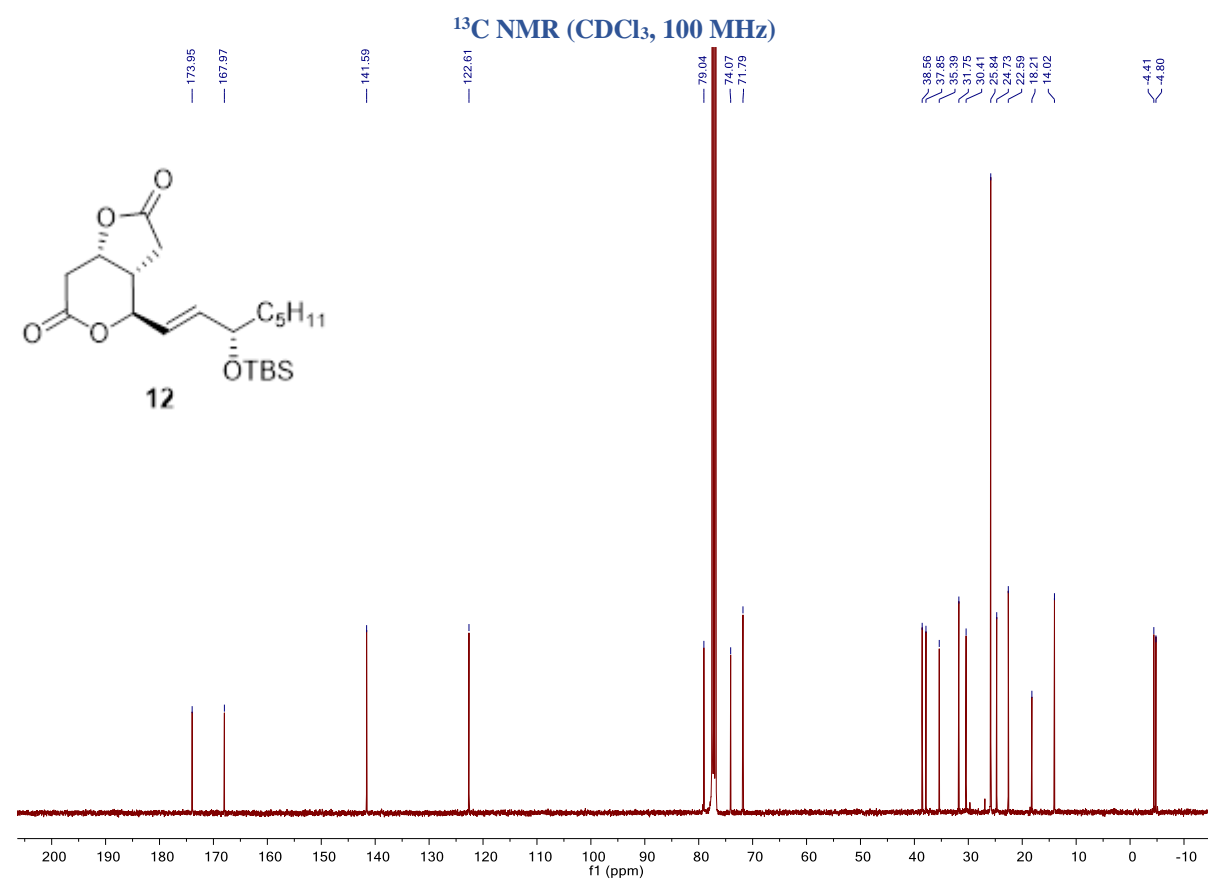

**<sup>1</sup>H NMR (CDCl<sub>3</sub>, 400 MHz)**

**18**

Chemical structure of compound **18** is shown above the spectrum. The structure is a substituted tetrahydrofuran derivative with a carboxylate group, a hydroxyl group, and a long alkyl chain (C<sub>5</sub>H<sub>11</sub>) attached to the ring. The OTBS group is also present.

The <sup>1</sup>H NMR spectrum displays the following chemical shifts (ppm): 0.01, 0.04, 0.05, 0.06, 0.08, 0.88, 0.89, 1.23, 1.25, 1.26, 1.27, 1.28, 1.29, 1.42, 1.44, 1.45, 1.48, 1.67, 1.77, 1.89, 2.07, 2.12, 2.56, 2.69, 2.83, 2.98, 3.00, 3.02, 3.04, 3.05, 4.13, 4.15, 4.52, 4.56, 4.64, 4.66, 4.68, 4.70, 4.72, 4.74, 4.76, 4.78, 4.80, 4.82, 4.84, 4.86, 4.88, 4.90, 4.92, 4.94, 4.96, 4.98, 5.00, 5.02, 5.04, 5.06, 5.08, 5.10, 5.12, 5.14, 5.16, 5.18, 5.20, 5.22, 5.24, 5.26, 5.28, 5.30, 5.32, 5.34, 5.36, 5.38, 5.40, 5.42, 5.44, 5.46, 5.48, 5.50, 5.52, 5.54, 5.56, 5.58, 5.60, 5.62, 5.64, 5.66, 5.68, 5.70, 5.72, 5.74, 5.76, 5.78, 5.80, 5.82, 5.84, 5.86, 5.88.

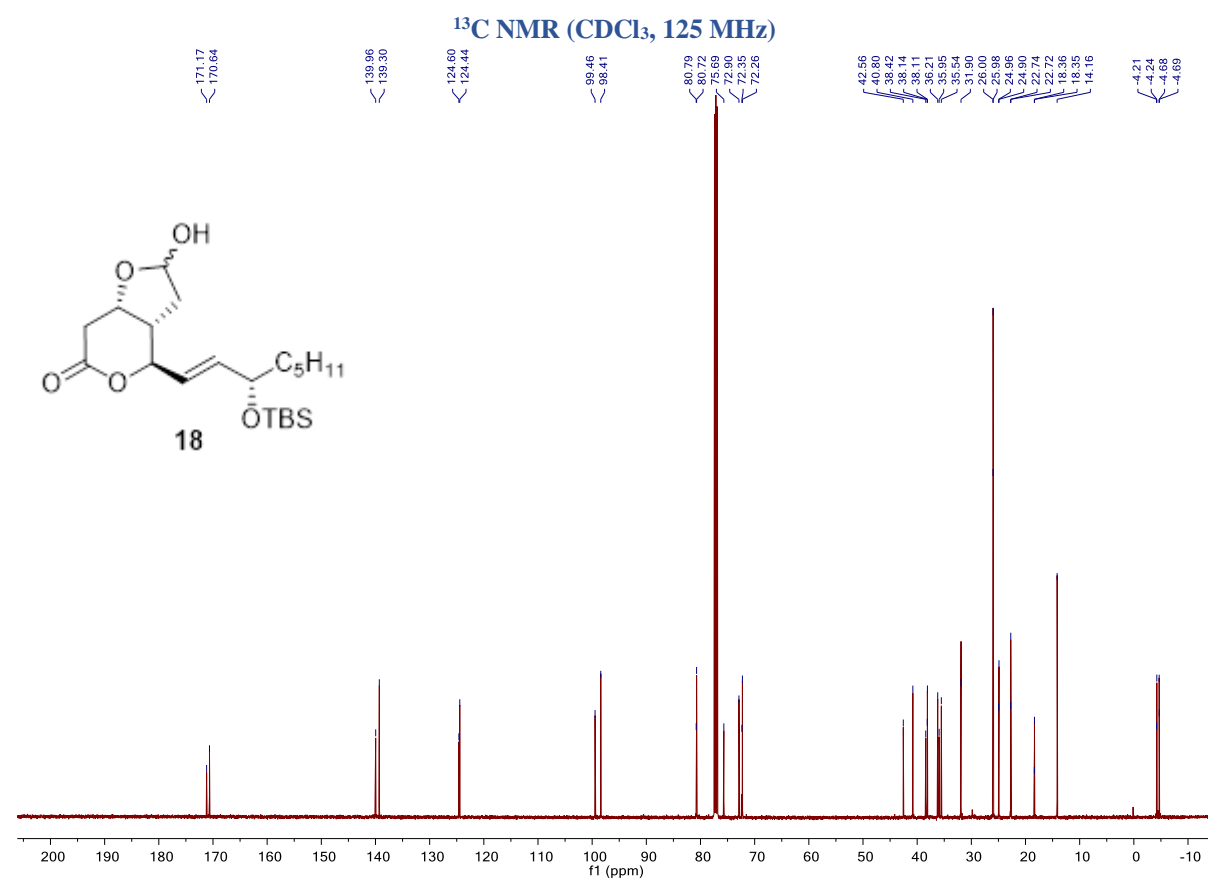

**(1*R*,4*S*,*E*)-4-((*tert*-Butyldimethylsilyl)oxy)-1-((2*S*,3*R*,5*R*)-2-(2-hydroxyethyl)-5-((4-methoxybenzyl)oxy)tetrahydrofuran-3-yl)non-2-en-1-ol (20)**

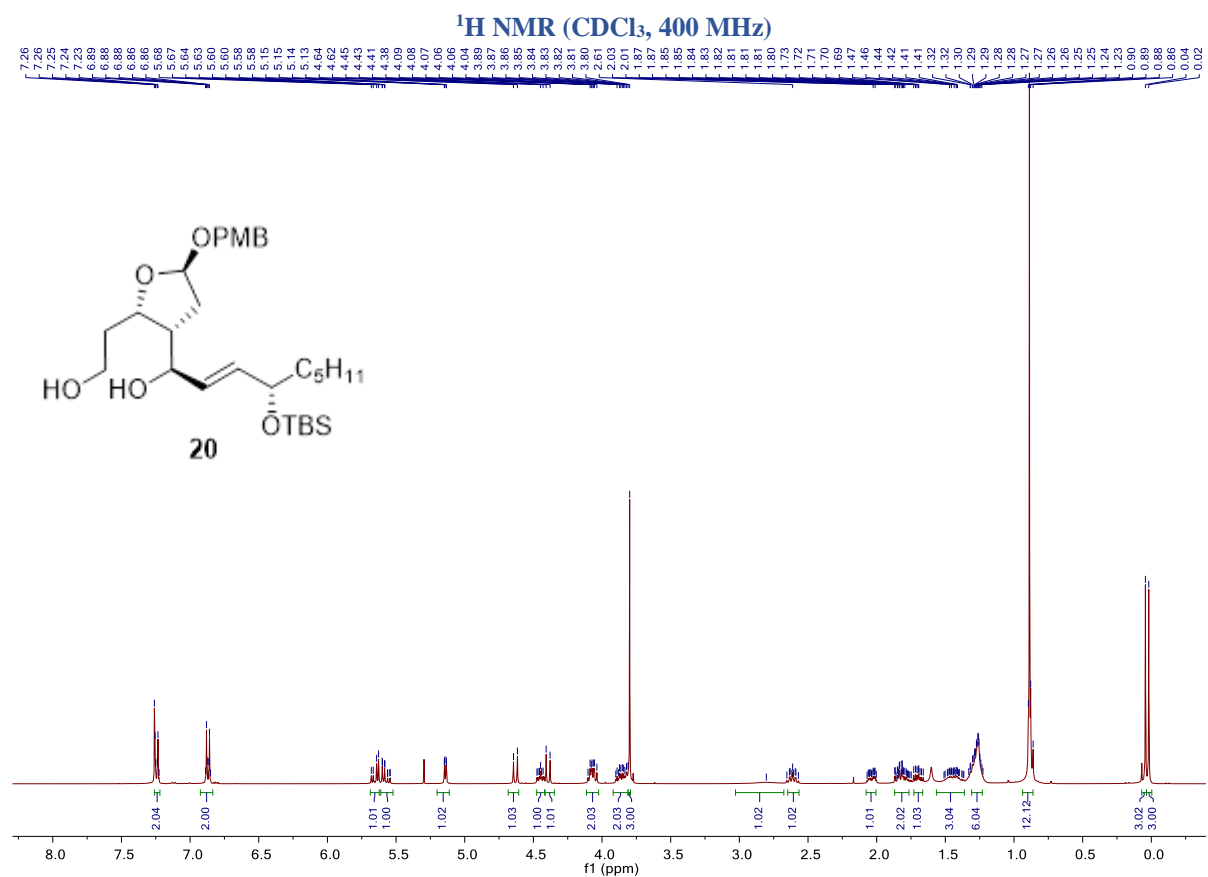

Supplement: Supplementary file 1 [file 24173079]
